# Supplementary material for: Review of Neopalpa Povolný, 1998 with description of a new species from California and Baja California, Mexico (Lepidoptera, Gelechiidae)
Source: Zookeys. 2017 Jan 17;(646):79–94. doi: 10.3897/zookeys.646.11411 (PMC5299441; doi:10.3897/zookeys.646.11411)
Supplement: Supplementary material 1 — Material examined and GenBank accessions [file zookeys-646-079-s001.xlsx]

## Sheet: Sheet1
BOLD species	Sample ID	ProcessID	COI-5P Seq. Length	GenBank Accessions	BIN	Dissection series	Dissection number	Sex	Collection Code	Collectors	Start day	Start month	Start Year	End day	End month	End year	Country/Ocean	State/Province	Region	Sector	Exact Site	Lat	Lon	Elev	Notes
Agonochaetia intermedia	TLMF Lep 10408	LEATB231-13	658[0n]	KY442160	BOLD:ABV4430				TLMF	Huemer P.	7	6	2013				Austria	Tirol	Nordtirol		Steinseehuettenweg	47.176	10.604	880
Anacampsis populella	CNCLEP00024290	CNCLA714-13	658[0n]	KY442256	BOLD:AAD3256				CNC		24	7	1987				Canada	Newfoundland and Labrador			Saint John`s	47.559	-52.713		Slide No. BL451|Reared on Populus tremuloides
Aristotelia decurtella	TLMF Lep 04322	PHLAE102-11	658[0n]	JN271075	BOLD:AAJ9936				TLMF	Huemer P.	1	8	2010				Italy	Piedmont	Cuneo, Massiccio Argentera		Vallone Scumbes linker Talhang/ Valdieri N (RN Juniperus phoenicea)	44.2836	7.39778	900
Australiopalpa commoni	11ANIC-15262	ANICX1262-11	658[0n]	KF387978	BOLD:AAW5819				ANIC	A.J.Wapshere	28	2	1986				Australia	New South Wales			Nelligen Ck	-35.64	150.053		Larvae Solanum prinophyollum
Caryocolum leucomelanella	TLMF Lep 01629	PHLAB829-10	658[0n]	HQ968833	BOLD:AAM3503				TLMF	Huemer P.	14	7	2010				Italy	Abruzzi	L`Aquila		NP Gran Sasso, Campo Imperatore, ex Miniera di Lignite	42.4267	13.7133	1750
Cosmardia moritzella	TLMF Lep 11704	LEATE292-13	658[0n]	KY442083	BOLD:AAJ5578				TLMF	P. Huemer	18	4	2013				Italy	South Tyrol	Muenstertal		Taufers E/ Waalweg E	46.657	10.477	1250
Dichomeris ligulella	CNCLEP00027009	MNAC567-07	658[0n]	KY442283	BOLD:AAA8109				CNC	JF Landry	4	8	2006				United States	Maryland	Calvert	Scientists Cliffs	2179 Bluebell Road	38.52	-76.514	15
Ephysteris diminutella	TLMF Lep 05303	PHLAF133-11	658[0n]	KY442129	BOLD:ABA7116				TLMF	Huemer P. & Tarmann G. M.	28	7	2011				Macedonia				Mavrovo NP, Korab, Korabska jezero, Kobilino pole	41.778	20.582	2080
Eurysacca quinoae	USNMQUI53	HELNA488-09	658[0n]	GU702590	BOLD:AAE0978				USNM	G. Aduviri	6	4	2009				Bolivia	La Paz			Quipaquipani, 4 km S Viacha	-16.6753	-68.2994	3880
Eurysaccoides	LACMENT326691	MNAQ705-15	658[0n]	KY442232	BOLD:ACX7800				LACM	J.P. & K.E.S. Donahue	30	6	1992				United States	California			Mono County, Mono Basin (S Side), 6.5 air mi ESE Lee Vining, T1N R27E Sec 28	37.917	-119.005	2042	#159338
Exceptia neopetrella	CNCLEP00090754	CNCLA838-13	656[2n]	KY442155	BOLD:ACG6919				CNC	Keifer	1	9	1933				United States	California			Alma				Paratype | Museum Vouchered:Type Series
Frumenta nundinella	CNCLEP00090829	MNAP036-12	658[0n]	KY442269	BOLD:AAH5546				CNC	WH Foott	16	9	1963				Canada	Ontario	Harrow			42.036	-82.918		Horse Nettle
Gelechia rhombella	TLMF Lep 06607	PHLAH107-12	658[0n]	KY442095	BOLD:AAE6372				TLMF	O. Rist	27	6	2005				Austria	Lower Austria			Bisamberg	48.327	16.344
Gnorimoschema gallaesolidaginis	CNCLEP00082384	MNAN390-11	658[0n]	JN270978	BOLD:AAT9819				CNC	B.C. Schmidt	1	9	2008				Canada	Ontario	Lanark County	Pakenham	alvar	45.33	-76.243	115	@ UV light
Gobipalpa inexpectata	MZH-LEP00000088	MNAP529-12	658[0n]	KY442258	BOLD:ACA7767				MZH	L. Kaila & K. Mikkola	27	7	1990				Kyrgyzstan			30 km E Naryn		41.42	76.33	2500	Hk.5295 | ad luc: agric. land/steppe
Hedma vicarians	MZH-LEP00000091.1	MNAP1232-13	307[0n]	KY442077					MZH	L. Kaila & K. Mikkola	18	8	1990				Kazakhstan		Dzhambulskaya Obl.	70 km NNE Frunze		43.24	75.03		rocky slope, ad luc.: `Hedcua? vicarians det. Povolny`
Insuloschema barbarae	EMEC331031	MNAP170-12	658[0n]	KY442142	BOLD:ABV9404	JAP	8362	M	EMEC	JA Powell	26	5	2001				United States	California	Ventura County	Santa Barbara Island	S. end above Cat Cyn.	33.467	-119.036	65	JAP8362 | J Powell No. 01E14.2, emerged 15.VI.2001, reared from Lycium californicum
Keiferia lycopersicella	CNCLEP00025515	MNAA242-07	658[0n]	KY442264	BOLD:AAK4075				CNCLEP	JF Landry	19	6	2006				United States	Florida	Highlands	Lake Placid, Archbold Bio Stn	Lake Annie	27.21	-81.348	32	MIC5867
Kiwaia lithodes	MM22003		939[61n]	JX984207	BOLD:ACH7237				Genbank	Hoare, Kaila, Kullberg	28	1	2009				New Zealand	Westland	Canavan's Knob			-43.21	170.09
Klimeschiopsis discontinuella	TLMF Lep 03733	PHLAD558-11	658[0n]	KX042611	BOLD:AAX0326				TLMF	Huemer P.	23	7	2002				Italy	South Tyrol	Suedtirol		Franzenshoehe N/ Stilfserjoch Strasse	46.534	10.477	2350
Lutilabria lutilabrella	TLMF Lep 06847	PHLAG453-12	658[0n]	KY442065	BOLD:ABW4984				TLMF	Habeler H.	30	5	2001				Slovenia				Kozina Umgebung	45.619	13.928	450	undetermined Type | TypeSeries:unknown
Microlechia chretieni	TLMF Lep 03857	PHLSA207-11	658[0n]	JN307728	BOLD:AAU3189				TLMF	Huemer P.	22	5	2004				Spain	Comunidad Valenciana	Valencia		Santa Pola, Playa del Pinet	38.1583	-0.625278	5
Neofaculta infernella	TLMF Lep 00592	PHLAA552-09	658[0n]	HM381434	BOLD:AAC1363				TLMF	P. Huemer	20	7	2009				Italy		Belluno		Passo di Valparola E - Passo Falzarego	46.5224	12.007	2150
Neopalpa donaldtrumpi	UCBMEP0201482	MNAK1104-14	658[0n]	KY442205	BOLD:ACR1768	VNZ	241	F	UCBME	S.L. Heydon & T.J. Zavortnik	6	2	2008	9	2	2008	United States	California	Imperial County	Algodones Dunes, Mammoth Wash	Niland-Glamis Rd., 29 km N. Hwy 78, 2008AL20	33.15	-115.317	43	Malaise trap
Neopalpa donaldtrumpi	UCBMEP0201628	MNAK1107-14	658[0n]	KY442187	BOLD:ACR1768	VNZ	240	M	UCBME	Bohart Museum Team	21	4	2009	25	4	2009	United States	California	Imperial County	Algodones Sand Dunes	Niland-Glamis Rd., 7.4 km NW Glamis	33.0326	-115.138		Holotype | Light trap | AL173
Neopalpa donaldtrumpi	UCBMEP0201629	MNAK1108-14	658[0n]	KY442192	BOLD:ACR1768			M	UCBME	Bohart Museum Team	21	4	2009	25	4	2009	United States	California	Imperial County	Algodones Sand Dunes	Niland-Glamis Rd., 7.4 km NW Glamis	33.0326	-115.138		light trap | AL173
Neopalpa donaldtrumpi	EMEC408498					VNZ	327	M	EMEC	P.A. Rude	1	4	1976				Mexico	Baja California	Arroyo Catavina	Hwy 1, 35 mi S Progresso		29.7294	-114.721		BL trap
Neopalpa donaldtrumpi	UCIS 313268					VNZ	556	M	UCR	J.B. Tucker	5	4	1975				United States	California	Riverside County	Deep Canyon, Coyote Creek		33.5833	-116.333
Neopalpa donaldtrumpi	UCRC ENT 461717							F	UCR	P.L. Boyd	16	8	1970	17	8	1970	United States	California	Riverside County	P.L. Boyd Desert Research Center	3.5 miles S. Palm Desert	33.648	-116.376		Malaise trap
Neopalpa donaldtrumpi	UCREM 18373					VNZ	580	M	UCR	Saul Frommer & R. Worley	13	6	1969	18	6	1969	United States	California	Riverside County	P.L. Boyd Desert Research Center	3.5 miles S. Palm Desert	33.648	-116.376		Malaise trap
Neopalpa neonata	BIOUG01549-A08	BBLOC1836-11	658[0n]	KY442249	BOLD:ABW8320				BIOUG	BioBus 2011	7	8	2011				United States	California	San Diego County	Anza-Borrego State Park	campground	33.27	-116.409	299	night collecting, dry bush and desert|clear and warm
Neopalpa neonata	BIOUG01860-D03	BBLOD1957-11	658[0n]	KY442140	BOLD:ABW8320				BIOUG	BioBus 2011	7	8	2011	9	8	2011	United States	California	San Diego County	Anza-Borrego State Park	campground	33.27	-116.409	229	Malaise trap, dry bush and desert
Neopalpa neonata	BIOUG01860-D04	BBLOD1958-11	658[0n]	KY442265	BOLD:ABW8320	MIC	6545	M	BIOUG	BioBus 2011	7	8	2011	9	8	2011	United States	California	San Diego County	Anza-Borrego State Park	campground	33.27	-116.409	229	Malaise trap, dry bush and desert
Neopalpa neonata	BIOUG11981-D10	GMRMD018-14	563[0n]	KY442106	BOLD:ABW8320				BIOUG	Peter Farrell	7	3	2014	14	3	2014	United States	California	San Diego County	San Diego	ResMed Corp., 9001 Spectrum Center Blvd.	32.826	-117.134		ResMed Corp.
Neopalpa neonata	BIOUG11981-D11	GMRMD019-14	594[0n]	KY442195	BOLD:ABW8320				BIOUG	Peter Farrell	7	3	2014	14	3	2014	United States	California	San Diego County	San Diego	ResMed Corp., 9001 Spectrum Center Blvd.	32.826	-117.134		ResMed Corp.
Neopalpa neonata	BIOUG06458-D01	LOCBF1010-13	583[0n]	KY442175	BOLD:ABW8320				BIOUG	N. Bloomfield	10	3	2013				United States	California	Imperial County	Sidewinder Road		32.8169	-114.815		BL
Neopalpa neonata	BIOUG06458-E01	LOCBF1022-13	552[0n]	KY442288	BOLD:ABW8320				BIOUG	N. Bloomfield	10	3	2013				United States	California	Imperial County	Sidewinder Road		32.8169	-114.815		BL
Neopalpa neonata	BIOUG06458-H03	LOCBF1060-13	547[2n]	KY442280	BOLD:ABW8320				BIOUG	N. Bloomfield	10	3	2013				United States	California	Imperial County	Sidewinder Road		32.8169	-114.815		BL
Neopalpa neonata	BIOUG06605-A02	LOCBF1070-13	582[0n]	KY442119	BOLD:ABW8320				BIOUG	N. Bloomfield	23	3	2013				United States	California	Imperial County	Sidewinder Road		32.8169	-114.815		BL
Neopalpa neonata	BIOUG06605-A12	LOCBF1080-13	593[0n]	KY442271	BOLD:ABW8320				BIOUG	N. Bloomfield	23	3	2013				United States	California	Imperial County	Sidewinder Road		32.8169	-114.815		BL
Neopalpa neonata	BIOUG06605-C09	LOCBF1101-13	592[0n]	KY442247	BOLD:ABW8320				BIOUG	N. Bloomfield	23	3	2013				United States	California	Imperial County	Sidewinder Road		32.8169	-114.815		BL
Neopalpa neonata	BIOUG06605-D06	LOCBF1110-13	564[0n]	KY442272	BOLD:ABW8320				BIOUG	N. Bloomfield	23	3	2013				United States	California	Imperial County	Sidewinder Road		32.8169	-114.815		BL
Neopalpa neonata	BIOUG06605-D07	LOCBF1111-13	581[0n]	KY442284	BOLD:ABW8320				BIOUG	N. Bloomfield	23	3	2013				United States	California	Imperial County	Sidewinder Road		32.8169	-114.815		BL
Neopalpa neonata	BIOUG06605-D08	LOCBF1112-13	592[0n]	KY442238	BOLD:ABW8320				BIOUG	N. Bloomfield	23	3	2013				United States	California	Imperial County	Sidewinder Road		32.8169	-114.815		BL
Neopalpa neonata	BIOUG06605-D11	LOCBF1115-13	548[0n]	KY442266	BOLD:ABW8320				BIOUG	N. Bloomfield	23	3	2013				United States	California	Imperial County	Sidewinder Road		32.8169	-114.815		BL
Neopalpa neonata	BIOUG06605-E12	LOCBF1128-13	572[0n]	KY442221	BOLD:ABW8320				BIOUG	N. Bloomfield	23	3	2013				United States	California	Imperial County	Sidewinder Road		32.8169	-114.815		BL
Neopalpa neonata	BIOUG06605-F01	LOCBF1129-13	561[0n]	KY442234	BOLD:ABW8320				BIOUG	N. Bloomfield	23	3	2013				United States	California	Imperial County	Sidewinder Road		32.8169	-114.815		BL
Neopalpa neonata	BIOUG06605-G01	LOCBF1141-13	582[0n]	KY442235	BOLD:ABW8320				BIOUG	N. Bloomfield	23	3	2013				United States	California	Imperial County	Sidewinder Road		32.8169	-114.815		BL
Neopalpa neonata	BIOUG06605-G12	LOCBF1152-13	572[0n]	KY442114	BOLD:ABW8320				BIOUG	N. Bloomfield	23	3	2013				United States	California	Imperial County	Sidewinder Road		32.8169	-114.815		BL
Neopalpa neonata	BIOUG06605-H10	LOCBF1162-13	592[0n]	KY442115	BOLD:ABW8320				BIOUG	N. Bloomfield	23	3	2013				United States	California	Imperial County	Sidewinder Road		32.8169	-114.815		BL
Neopalpa neonata	BIOUG06806-A11	LOCBF1364-13	574[0n]	KY442203	BOLD:ABW8320				BIOUG	N. Bloomfield	23	3	2013				United States	California	Imperial County	Sidewinder Road		32.8169	-114.815		BL
Neopalpa neonata	BIOUG06806-B11	LOCBF1376-13	555[0n]	KY442257	BOLD:ABW8320				BIOUG	N. Bloomfield	23	3	2013				United States	California	Imperial County	Sidewinder Road		32.8169	-114.815		BL
Neopalpa neonata	BIOUG06806-C02	LOCBF1379-13	591[0n]	KY442085	BOLD:ABW8320				BIOUG	N. Bloomfield	23	3	2013				United States	California	Imperial County	Sidewinder Road		32.8169	-114.815		BL
Neopalpa neonata	BIOUG06806-C03	LOCBF1380-13	593[0n]	KY442241	BOLD:ABW8320				BIOUG	N. Bloomfield	23	3	2013				United States	California	Imperial County	Sidewinder Road		32.8169	-114.815		BL
Neopalpa neonata	BIOUG06806-C06	LOCBF1383-13	574[0n]	KY442189	BOLD:ABW8320				BIOUG	N. Bloomfield	23	3	2013				United States	California	Imperial County	Sidewinder Road		32.8169	-114.815		BL
Neopalpa neonata	BIOUG06806-C08	LOCBF1385-13	572[0n]	KY442251	BOLD:ABW8320				BIOUG	N. Bloomfield	23	3	2013				United States	California	Imperial County	Sidewinder Road		32.8169	-114.815		BL
Neopalpa neonata	BIOUG06806-C09	LOCBF1386-13	593[0n]	KY442087	BOLD:ABW8320				BIOUG	N. Bloomfield	23	3	2013				United States	California	Imperial County	Sidewinder Road		32.8169	-114.815		BL
Neopalpa neonata	BIOUG06806-C10	LOCBF1387-13	591[0n]	KY442224	BOLD:ABW8320				BIOUG	N. Bloomfield	23	3	2013				United States	California	Imperial County	Sidewinder Road		32.8169	-114.815		BL
Neopalpa neonata	BIOUG06806-C12	LOCBF1389-13	555[0n]	KY442252	BOLD:ABW8320				BIOUG	N. Bloomfield	23	3	2013				United States	California	Imperial County	Sidewinder Road		32.8169	-114.815		BL
Neopalpa neonata	BIOUG06806-D08	LOCBF1397-13	591[0n]	KY442122	BOLD:ABW8320				BIOUG	N. Bloomfield	23	3	2013				United States	California	Imperial County	Sidewinder Road		32.8169	-114.815		BL
Neopalpa neonata	BIOUG06806-D09	LOCBF1398-13	548[0n]	KY442153	BOLD:ABW8320				BIOUG	N. Bloomfield	23	3	2013				United States	California	Imperial County	Sidewinder Road		32.8169	-114.815		BL
Neopalpa neonata	BIOUG06806-D10	LOCBF1399-13	574[0n]	KY442111	BOLD:ABW8320				BIOUG	N. Bloomfield	23	3	2013				United States	California	Imperial County	Sidewinder Road		32.8169	-114.815		BL
Neopalpa neonata	BIOUG06806-E09	LOCBF1410-13	570[0n]	KY442213	BOLD:ABW8320				BIOUG	N. Bloomfield	23	3	2013				United States	California	Imperial County	Sidewinder Road		32.8169	-114.815		BL
Neopalpa neonata	BIOUG06806-E11	LOCBF1412-13	583[0n]	KY442198	BOLD:ABW8320				BIOUG	N. Bloomfield	23	3	2013				United States	California	Imperial County	Sidewinder Road		32.8169	-114.815		BL
Neopalpa neonata	BIOUG06806-E12	LOCBF1413-13	593[0n]	KY442270	BOLD:ABW8320				BIOUG	N. Bloomfield	23	3	2013				United States	California	Imperial County	Sidewinder Road		32.8169	-114.815		BL
Neopalpa neonata	BIOUG06806-F03	LOCBF1416-13	603[0n]	KY442128	BOLD:ABW8320				BIOUG	N. Bloomfield	23	3	2013				United States	California	Imperial County	Sidewinder Road		32.8169	-114.815		BL
Neopalpa neonata	BIOUG06806-F05	LOCBF1418-13	533[0n]	KY442273	BOLD:ABW8320				BIOUG	N. Bloomfield	23	3	2013				United States	California	Imperial County	Sidewinder Road		32.8169	-114.815		BL
Neopalpa neonata	BIOUG06806-F07	LOCBF1420-13	593[0n]	KY442194	BOLD:ABW8320				BIOUG	N. Bloomfield	23	3	2013				United States	California	Imperial County	Sidewinder Road		32.8169	-114.815		BL
Neopalpa neonata	BIOUG06806-G01	LOCBF1426-13	562[0n]	KY442180	BOLD:ABW8320				BIOUG	N. Bloomfield	23	3	2013				United States	California	Imperial County	Sidewinder Road		32.8169	-114.815		BL
Neopalpa neonata	BIOUG06806-G02	LOCBF1427-13	556[0n]	KY442135	BOLD:ABW8320				BIOUG	N. Bloomfield	23	3	2013				United States	California	Imperial County	Sidewinder Road		32.8169	-114.815		BL
Neopalpa neonata	BIOUG06806-G03	LOCBF1428-13	555[0n]	KY442169	BOLD:ABW8320				BIOUG	N. Bloomfield	23	3	2013				United States	California	Imperial County	Sidewinder Road		32.8169	-114.815		BL
Neopalpa neonata	BIOUG06806-G09	LOCBF1434-13	593[0n]	KY442147	BOLD:ABW8320				BIOUG	N. Bloomfield	23	3	2013				United States	California	Imperial County	Sidewinder Road		32.8169	-114.815		BL
Neopalpa neonata	BIOUG06806-H04	LOCBF1441-13	569[0n]	KY442108	BOLD:ABW8320				BIOUG	N. Bloomfield	23	3	2013				United States	California	Imperial County	Sidewinder Road		32.8169	-114.815		BL
Neopalpa neonata	BIOUG06806-H06	LOCBF1443-13	583[0n]	KY442167	BOLD:ABW8320				BIOUG	N. Bloomfield	23	3	2013				United States	California	Imperial County	Sidewinder Road		32.8169	-114.815		BL
Neopalpa neonata	BIOUG06806-H07	LOCBF1444-13	554[0n]	KY442100	BOLD:ABW8320				BIOUG	N. Bloomfield	23	3	2013				United States	California	Imperial County	Sidewinder Road		32.8169	-114.815		BL
Neopalpa neonata	BIOUG06806-H09	LOCBF1446-13	583[0n]	KY442254	BOLD:ABW8320				BIOUG	N. Bloomfield	23	3	2013				United States	California	Imperial County	Sidewinder Road		32.8169	-114.815		BL
Neopalpa neonata	BIOUG06806-H10	LOCBF1447-13	593[0n]	KY442282	BOLD:ABW8320				BIOUG	N. Bloomfield	23	3	2013				United States	California	Imperial County	Sidewinder Road		32.8169	-114.815		BL
Neopalpa neonata	BIOUG06942-A04	LOCBF1642-13	588[0n]	KY442123	BOLD:ABW8320				BIOUG	N. Bloomfield	23	3	2013				United States	California	Imperial County	Sidewinder Road		32.8169	-114.815		BL
Neopalpa neonata	BIOUG06942-A06	LOCBF1644-13	588[0n]	KY442278	BOLD:ABW8320				BIOUG	N. Bloomfield	23	3	2013				United States	California	Imperial County	Sidewinder Road		32.8169	-114.815		BL
Neopalpa neonata	BIOUG06942-A12	LOCBF1650-13	582[0n]	KY442075	BOLD:ABW8320				BIOUG	N. Bloomfield	23	3	2013				United States	California	Imperial County	Sidewinder Road		32.8169	-114.815		BL
Neopalpa neonata	BIOUG06942-B03	LOCBF1653-13	588[0n]	KY442099	BOLD:ABW8320				BIOUG	N. Bloomfield	23	3	2013				United States	California	Imperial County	Sidewinder Road		32.8169	-114.815		BL
Neopalpa neonata	BIOUG06942-B06	LOCBF1656-13	588[0n]	KY442072	BOLD:ABW8320				BIOUG	N. Bloomfield	23	3	2013				United States	California	Imperial County	Sidewinder Road		32.8169	-114.815		BL
Neopalpa neonata	BIOUG06942-B09	LOCBF1659-13	583[0n]	KY442262	BOLD:ABW8320				BIOUG	N. Bloomfield	23	3	2013				United States	California	Imperial County	Sidewinder Road		32.8169	-114.815		BL
Neopalpa neonata	BIOUG06942-C01	LOCBF1663-13	564[0n]	KY442152	BOLD:ABW8320				BIOUG	N. Bloomfield	23	3	2013				United States	California	Imperial County	Sidewinder Road		32.8169	-114.815		BL
Neopalpa neonata	BIOUG06942-C09	LOCBF1671-13	564[0n]	KY442287	BOLD:ABW8320				BIOUG	N. Bloomfield	23	3	2013				United States	California	Imperial County	Sidewinder Road		32.8169	-114.815		BL
Neopalpa neonata	BIOUG06942-D10	LOCBF1684-13	582[0n]	KY442259	BOLD:ABW8320				BIOUG	N. Bloomfield	23	3	2013				United States	California	Imperial County	Sidewinder Road		32.8169	-114.815		BL
Neopalpa neonata	BIOUG06942-E01	LOCBF1687-13	528[0n]	KY442242	BOLD:ABW8320				BIOUG	N. Bloomfield	23	3	2013				United States	California	Imperial County	Sidewinder Road		32.8169	-114.815		BL
Neopalpa neonata	BIOUG06942-E02	LOCBF1688-13	588[0n]	KY442227	BOLD:ABW8320				BIOUG	N. Bloomfield	23	3	2013				United States	California	Imperial County	Sidewinder Road		32.8169	-114.815		BL
Neopalpa neonata	BIOUG06942-E03	LOCBF1689-13	589[0n]	KY442158	BOLD:ABW8320				BIOUG	N. Bloomfield	23	3	2013				United States	California	Imperial County	Sidewinder Road		32.8169	-114.815		BL
Neopalpa neonata	BIOUG06942-F06	LOCBF1704-13	588[0n]	KY442109	BOLD:ABW8320				BIOUG	N. Bloomfield	23	3	2013				United States	California	Imperial County	Sidewinder Road		32.8169	-114.815		BL
Neopalpa neonata	BIOUG06942-F08	LOCBF1706-13	564[0n]	KY442120	BOLD:ABW8320				BIOUG	N. Bloomfield	23	3	2013				United States	California	Imperial County	Sidewinder Road		32.8169	-114.815		BL
Neopalpa neonata	BIOUG06942-G02	LOCBF1712-13	588[0n]	KY442223	BOLD:ABW8320				BIOUG	N. Bloomfield	23	3	2013				United States	California	Imperial County	Sidewinder Road		32.8169	-114.815		BL
Neopalpa neonata	BIOUG06942-G03	LOCBF1713-13	576[0n]	KY442139	BOLD:ABW8320				BIOUG	N. Bloomfield	23	3	2013				United States	California	Imperial County	Sidewinder Road		32.8169	-114.815		BL
Neopalpa neonata	BIOUG06942-G04	LOCBF1714-13	564[0n]	KY442289	BOLD:ABW8320				BIOUG	N. Bloomfield	23	3	2013				United States	California	Imperial County	Sidewinder Road		32.8169	-114.815		BL
Neopalpa neonata	BIOUG06942-G07	LOCBF1717-13	564[0n]	KY442096	BOLD:ABW8320				BIOUG	N. Bloomfield	23	3	2013				United States	California	Imperial County	Sidewinder Road		32.8169	-114.815		BL
Neopalpa neonata	BIOUG06942-H04	LOCBF1726-13	588[0n]	KY442138	BOLD:ABW8320				BIOUG	N. Bloomfield	23	3	2013				United States	California	Imperial County	Sidewinder Road		32.8169	-114.815		BL
Neopalpa neonata	BIOUG06942-H05	LOCBF1727-13	582[0n]	KY442101	BOLD:ABW8320				BIOUG	N. Bloomfield	23	3	2013				United States	California	Imperial County	Sidewinder Road		32.8169	-114.815		BL
Neopalpa neonata	BIOUG06943-B02	LOCBF1747-13	582[0n]	KY442209	BOLD:ABW8320				BIOUG	N. Bloomfield	23	3	2013				United States	California	Imperial County	Sidewinder Road		32.8169	-114.815		BL
Neopalpa neonata	BIOUG06943-D11	LOCBF1780-13	589[0n]	KY442091	BOLD:ABW8320				BIOUG	N. Bloomfield	23	3	2013				United States	California	Imperial County	Sidewinder Road		32.8169	-114.815		BL
Neopalpa neonata	BIOUG06943-E10	LOCBF1791-13	591[0n]	KY442130	BOLD:ABW8320				BIOUG	N. Bloomfield	23	3	2013				United States	California	Imperial County	Sidewinder Road		32.8169	-114.815		BL
Neopalpa neonata	BIOUG06943-E12	LOCBF1793-13	583[0n]	KY442190	BOLD:ABW8320				BIOUG	N. Bloomfield	23	3	2013				United States	California	Imperial County	Sidewinder Road		32.8169	-114.815		BL
Neopalpa neonata	BIOUG06943-F06	LOCBF1799-13	591[0n]	KY442136	BOLD:ABW8320				BIOUG	N. Bloomfield	23	3	2013				United States	California	Imperial County	Sidewinder Road		32.8169	-114.815		BL
Neopalpa neonata	BIOUG06943-F10	LOCBF1803-13	592[0n]	KY442127	BOLD:ABW8320				BIOUG	N. Bloomfield	23	3	2013				United States	California	Imperial County	Sidewinder Road		32.8169	-114.815		BL
Neopalpa neonata	BIOUG06943-F11	LOCBF1804-13	592[0n]	KY442092	BOLD:ABW8320				BIOUG	N. Bloomfield	23	3	2013				United States	California	Imperial County	Sidewinder Road		32.8169	-114.815		BL
Neopalpa neonata	BIOUG06943-G01	LOCBF1806-13	588[0n]	KY442163	BOLD:ABW8320				BIOUG	N. Bloomfield	23	3	2013				United States	California	Imperial County	Sidewinder Road		32.8169	-114.815		BL
Neopalpa neonata	BIOUG06943-G02	LOCBF1807-13	591[0n]	KY442069	BOLD:ABW8320				BIOUG	N. Bloomfield	23	3	2013				United States	California	Imperial County	Sidewinder Road		32.8169	-114.815		BL
Neopalpa neonata	BIOUG06943-G06	LOCBF1811-13	589[0n]	KY442103	BOLD:ABW8320				BIOUG	N. Bloomfield	23	3	2013				United States	California	Imperial County	Sidewinder Road		32.8169	-114.815		BL
Neopalpa neonata	BIOUG06943-G07	LOCBF1812-13	592[0n]	KY442219	BOLD:ABW8320				BIOUG	N. Bloomfield	23	3	2013				United States	California	Imperial County	Sidewinder Road		32.8169	-114.815		BL
Neopalpa neonata	BIOUG06943-G08	LOCBF1813-13	592[0n]	KY442068	BOLD:ABW8320				BIOUG	N. Bloomfield	23	3	2013				United States	California	Imperial County	Sidewinder Road		32.8169	-114.815		BL
Neopalpa neonata	BIOUG06943-G09	LOCBF1814-13	591[0n]	KY442250	BOLD:ABW8320				BIOUG	N. Bloomfield	23	3	2013				United States	California	Imperial County	Sidewinder Road		32.8169	-114.815		BL
Neopalpa neonata	BIOUG06943-H01	LOCBF1818-13	583[0n]	KY442286	BOLD:ABW8320				BIOUG	N. Bloomfield	23	3	2013				United States	California	Imperial County	Sidewinder Road		32.8169	-114.815		BL
Neopalpa neonata	BIOUG06943-H02	LOCBF1819-13	588[0n]	KY442217	BOLD:ABW8320				BIOUG	N. Bloomfield	23	3	2013				United States	California	Imperial County	Sidewinder Road		32.8169	-114.815		BL
Neopalpa neonata	BIOUG06943-H04	LOCBF1821-13	588[0n]	KY442201	BOLD:ABW8320				BIOUG	N. Bloomfield	23	3	2013				United States	California	Imperial County	Sidewinder Road		32.8169	-114.815		BL
Neopalpa neonata	BIOUG06943-H08	LOCBF1825-13	589[0n]	KY442133	BOLD:ABW8320				BIOUG	N. Bloomfield	23	3	2013				United States	California	Imperial County	Sidewinder Road		32.8169	-114.815		BL
Neopalpa neonata	BIOUG06943-H10	LOCBF1827-13	591[0n]	KY442253	BOLD:ABW8320				BIOUG	N. Bloomfield	23	3	2013				United States	California	Imperial County	Sidewinder Road		32.8169	-114.815		BL
Neopalpa neonata	BIOUG06947-B03	LOCBF1843-13	589[0n]	KY442112	BOLD:ABW8320				BIOUG	N. Bloomfield	23	3	2013				United States	California	Imperial County	Sidewinder Road		32.8169	-114.815		BL
Neopalpa neonata	BIOUG06947-B04	LOCBF1844-13	589[0n]	KY442102	BOLD:ABW8320				BIOUG	N. Bloomfield	23	3	2013				United States	California	Imperial County	Sidewinder Road		32.8169	-114.815		BL
Neopalpa neonata	BIOUG06947-B05	LOCBF1845-13	592[0n]	KY442237	BOLD:ABW8320				BIOUG	N. Bloomfield	23	3	2013				United States	California	Imperial County	Sidewinder Road		32.8169	-114.815		BL
Neopalpa neonata	BIOUG06947-F01	LOCBF1889-13	591[0n]	KY442171	BOLD:ABW8320				BIOUG	N. Bloomfield	23	3	2013				United States	California	Imperial County	Sidewinder Road		32.8169	-114.815		BL
Neopalpa neonata	BIOUG06947-F02	LOCBF1890-13	589[0n]	KY442277	BOLD:ABW8320				BIOUG	N. Bloomfield	23	3	2013				United States	California	Imperial County	Sidewinder Road		32.8169	-114.815		BL
Neopalpa neonata	BIOUG06947-F04	LOCBF1892-13	592[0n]	KY442174	BOLD:ABW8320				BIOUG	N. Bloomfield	23	3	2013				United States	California	Imperial County	Sidewinder Road		32.8169	-114.815		BL
Neopalpa neonata	BIOUG06947-F05	LOCBF1893-13	588[0n]	KY442276	BOLD:ABW8320				BIOUG	N. Bloomfield	23	3	2013				United States	California	Imperial County	Sidewinder Road		32.8169	-114.815		BL
Neopalpa neonata	BIOUG06947-F06	LOCBF1894-13	591[0n]	KY442285	BOLD:ABW8320				BIOUG	N. Bloomfield	23	3	2013				United States	California	Imperial County	Sidewinder Road		32.8169	-114.815		BL
Neopalpa neonata	BIOUG06947-F08	LOCBF1896-13	565[0n]	KY442290	BOLD:ABW8320				BIOUG	N. Bloomfield	23	3	2013				United States	California	Imperial County	Sidewinder Road		32.8169	-114.815		BL
Neopalpa neonata	BIOUG06947-F10	LOCBF1898-13	564[0n]	KY442222	BOLD:ABW8320				BIOUG	N. Bloomfield	23	3	2013				United States	California	Imperial County	Sidewinder Road		32.8169	-114.815		BL
Neopalpa neonata	BIOUG06947-F11	LOCBF1899-13	592[0n]	KY442218	BOLD:ABW8320				BIOUG	N. Bloomfield	23	3	2013				United States	California	Imperial County	Sidewinder Road		32.8169	-114.815		BL
Neopalpa neonata	BIOUG06947-F12	LOCBF1900-13	591[0n]	KY442228	BOLD:ABW8320				BIOUG	N. Bloomfield	23	3	2013				United States	California	Imperial County	Sidewinder Road		32.8169	-114.815		BL
Neopalpa neonata	BIOUG06947-G01	LOCBF1901-13	582[0n]	KY442268	BOLD:ABW8320				BIOUG	N. Bloomfield	23	3	2013				United States	California	Imperial County	Sidewinder Road		32.8169	-114.815		BL
Neopalpa neonata	BIOUG06947-G02	LOCBF1902-13	591[0n]	KY442116	BOLD:ABW8320				BIOUG	N. Bloomfield	23	3	2013				United States	California	Imperial County	Sidewinder Road		32.8169	-114.815		BL
Neopalpa neonata	BIOUG06947-G03	LOCBF1903-13	591[0n]	KY442179	BOLD:ABW8320				BIOUG	N. Bloomfield	23	3	2013				United States	California	Imperial County	Sidewinder Road		32.8169	-114.815		BL
Neopalpa neonata	BIOUG06947-G04	LOCBF1904-13	591[0n]	KY442229	BOLD:ABW8320				BIOUG	N. Bloomfield	23	3	2013				United States	California	Imperial County	Sidewinder Road		32.8169	-114.815		BL
Neopalpa neonata	BIOUG06947-G12	LOCBF1912-13	591[0n]	KY442215	BOLD:ABW8320				BIOUG	N. Bloomfield	23	3	2013				United States	California	Imperial County	Sidewinder Road		32.8169	-114.815		BL
Neopalpa neonata	BIOUG06947-H01	LOCBF1913-13	591[0n]	KY442104	BOLD:ABW8320				BIOUG	N. Bloomfield	23	3	2013				United States	California	Imperial County	Sidewinder Road		32.8169	-114.815		BL
Neopalpa neonata	BIOUG06947-H03	LOCBF1915-13	588[0n]	KY442292	BOLD:ABW8320				BIOUG	N. Bloomfield	23	3	2013				United States	California	Imperial County	Sidewinder Road		32.8169	-114.815		BL
Neopalpa neonata	BIOUG06947-H07	LOCBF1919-13	588[0n]	KY442146	BOLD:ABW8320				BIOUG	N. Bloomfield	23	3	2013				United States	California	Imperial County	Sidewinder Road		32.8169	-114.815		BL
Neopalpa neonata	BIOUG06947-H08	LOCBF1920-13	591[0n]	KY442094	BOLD:ABW8320				BIOUG	N. Bloomfield	23	3	2013				United States	California	Imperial County	Sidewinder Road		32.8169	-114.815		BL
Neopalpa neonata	BIOUG06947-H11	LOCBF1923-13	591[0n]	KY442186	BOLD:ABW8320				BIOUG	N. Bloomfield	23	3	2013				United States	California	Imperial County	Sidewinder Road		32.8169	-114.815		BL
Neopalpa neonata	BIOUG06949-B03	LOCBF2033-13	589[0n]	KY442132	BOLD:ABW8320				BIOUG	N. Bloomfield	23	3	2013				United States	California	Imperial County	Sidewinder Road		32.8169	-114.815		BL
Neopalpa neonata	BIOUG06949-B08	LOCBF2038-13	588[0n]	KY442248	BOLD:ABW8320				BIOUG	N. Bloomfield	23	3	2013				United States	California	Imperial County	Sidewinder Road		32.8169	-114.815		BL
Neopalpa neonata	BIOUG06949-B09	LOCBF2039-13	576[0n]	KY442274	BOLD:ABW8320				BIOUG	N. Bloomfield	10	3	2013				United States	California	Imperial County	Sidewinder Road		32.8169	-114.815		BL
Neopalpa neonata	BIOUG06949-B11	LOCBF2041-13	564[0n]	KY442159	BOLD:ABW8320				BIOUG	N. Bloomfield	10	3	2013				United States	California	Imperial County	Sidewinder Road		32.8169	-114.815		BL
Neopalpa neonata	BIOUG06949-F04	LOCBF2082-13	592[0n]	KY442172	BOLD:ABW8320				BIOUG	N. Bloomfield	23	3	2013				United States	California	Imperial County	Sidewinder Road		32.8169	-114.815		BL
Neopalpa neonata	BIOUG06952-C11	LOCBF2338-13	591[0n]	KY442208	BOLD:ABW8320				BIOUG	N. Bloomfield	23	3	2013				United States	California	Imperial County	Sidewinder Road		32.8169	-114.815		BL
Neopalpa neonata	BIOUG07104-F09	LOCBF2467-13	588[0n]	KY442126	BOLD:ABW8320				BIOUG	N. Bloomfield	23	3	2013				United States	California	Imperial County	Sidewinder Road		32.8169	-114.815		BL
Neopalpa neonata	BIOUG07104-H05	LOCBF2487-13	591[0n]	KY442168	BOLD:ABW8320				BIOUG	N. Bloomfield	23	3	2013				United States	California	Imperial County	Sidewinder Road		32.8169	-114.815		BL
Neopalpa neonata	BIOUG07105-C08	LOCBF2525-13	550[3n]	KY442181	BOLD:ABW8320				BIOUG	N. Bloomfield	23	3	2013				United States	California	Imperial County	Sidewinder Road		32.8169	-114.815		BL
Neopalpa neonata	BIOUG07105-G02	LOCBF2567-13	591[0n]	KY442131	BOLD:ABW8320				BIOUG	N. Bloomfield	23	3	2013				United States	California	Imperial County	Sidewinder Road		32.8169	-114.815		BL
Neopalpa neonata	BIOUG07105-G03	LOCBF2568-13	552[0n]	KY442196	BOLD:ABW8320				BIOUG	N. Bloomfield	23	3	2013				United States	California	Imperial County	Sidewinder Road		32.8169	-114.815		BL
Neopalpa neonata	BIOUG06176-A03	LOCBF288-13	562[0n]	KY442193	BOLD:ABW8320				BIOUG	N. Bloomfield	10	3	2013				United States	California	Imperial County	Sidewinder Road		32.8169	-114.815		BL
Neopalpa neonata	BIOUG06176-A09	LOCBF294-13	555[0n]	KY442118	BOLD:ABW8320				BIOUG	N. Bloomfield	10	3	2013				United States	California	Imperial County	Sidewinder Road		32.8169	-114.815		BL
Neopalpa neonata	BIOUG06176-A10	LOCBF295-13	555[0n]	KY442185	BOLD:ABW8320				BIOUG	N. Bloomfield	10	3	2013				United States	California	Imperial County	Sidewinder Road		32.8169	-114.815		BL
Neopalpa neonata	BIOUG06176-A11	LOCBF296-13	556[0n]	KY442149	BOLD:ABW8320				BIOUG	N. Bloomfield	10	3	2013				United States	California	Imperial County	Sidewinder Road		32.8169	-114.815		BL
Neopalpa neonata	BIOUG06176-B01	LOCBF298-13	593[0n]	KY442183	BOLD:ABW8320				BIOUG	N. Bloomfield	10	3	2013				United States	California	Imperial County	Sidewinder Road		32.8169	-114.815		BL
Neopalpa neonata	BIOUG06176-B02	LOCBF299-13	533[0n]	KY442093	BOLD:ABW8320				BIOUG	N. Bloomfield	10	3	2013				United States	California	Imperial County	Sidewinder Road		32.8169	-114.815		BL
Neopalpa neonata	BIOUG06176-B04	LOCBF301-13	571[0n]	KY442178	BOLD:ABW8320				BIOUG	N. Bloomfield	10	3	2013				United States	California	Imperial County	Sidewinder Road		32.8169	-114.815		BL
Neopalpa neonata	BIOUG06176-C06	LOCBF315-13	573[0n]	KY442137	BOLD:ABW8320				BIOUG	N. Bloomfield	10	3	2013				United States	California	Imperial County	Sidewinder Road		32.8169	-114.815		BL
Neopalpa neonata	BIOUG06176-C07	LOCBF316-13	579[4n]	KY442230	BOLD:ABW8320				BIOUG	N. Bloomfield	10	3	2013				United States	California	Imperial County	Sidewinder Road		32.8169	-114.815		BL
Neopalpa neonata	BIOUG06176-C10	LOCBF319-13	563[0n]	KY442144	BOLD:ABW8320				BIOUG	N. Bloomfield	10	3	2013				United States	California	Imperial County	Sidewinder Road		32.8169	-114.815		BL
Neopalpa neonata	BIOUG06176-C12	LOCBF321-13	555[0n]	KY442165	BOLD:ABW8320				BIOUG	N. Bloomfield	10	3	2013				United States	California	Imperial County	Sidewinder Road		32.8169	-114.815		BL
Neopalpa neonata	BIOUG06258-A04	LOCBF669-13	534[0n]	KY442148	BOLD:ABW8320				BIOUG	N. Bloomfield	23	3	2013				United States	California	Imperial County	Sidewinder Road		32.8169	-114.815		BL
Neopalpa neonata	BIOUG06258-A05	LOCBF670-13	546[0n]	KY442214	BOLD:ABW8320				BIOUG	N. Bloomfield	23	3	2013				United States	California	Imperial County	Sidewinder Road		32.8169	-114.815		BL
Neopalpa neonata	BIOUG06258-A07	LOCBF672-13	552[0n]	KY442267	BOLD:ABW8320				BIOUG	N. Bloomfield	23	3	2013				United States	California	Imperial County	Sidewinder Road		32.8169	-114.815		BL
Neopalpa neonata	BIOUG06258-A10	LOCBF675-13	552[0n]	KY442154	BOLD:ABW8320				BIOUG	N. Bloomfield	23	3	2013				United States	California	Imperial County	Sidewinder Road		32.8169	-114.815		BL
Neopalpa neonata	BIOUG06258-A11	LOCBF676-13	564[0n]	KY442121	BOLD:ABW8320				BIOUG	N. Bloomfield	23	3	2013				United States	California	Imperial County	Sidewinder Road		32.8169	-114.815		BL
Neopalpa neonata	BIOUG06258-B10	LOCBF687-13	552[0n]	KY442173	BOLD:ABW8320				BIOUG	N. Bloomfield	23	3	2013				United States	California	Imperial County	Sidewinder Road		32.8169	-114.815		BL
Neopalpa neonata	BIOUG06258-C06	LOCBF695-13	588[0n]	KY442110	BOLD:ABW8320				BIOUG	N. Bloomfield	23	3	2013				United States	California	Imperial County	Sidewinder Road		32.8169	-114.815		BL
Neopalpa neonata	BIOUG06258-D05	LOCBF706-13	564[0n]	KY442166	BOLD:ABW8320				BIOUG	N. Bloomfield	23	3	2013				United States	California	Imperial County	Sidewinder Road		32.8169	-114.815		BL
Neopalpa neonata	BIOUG06258-D06	LOCBF707-13	591[0n]	KY442239	BOLD:ABW8320				BIOUG	N. Bloomfield	23	3	2013				United States	California	Imperial County	Sidewinder Road		32.8169	-114.815		BL
Neopalpa neonata	BIOUG06258-D07	LOCBF708-13	525[3n]	KY442090	BOLD:ABW8320				BIOUG	N. Bloomfield	23	3	2013				United States	California	Imperial County	Sidewinder Road		32.8169	-114.815		BL
Neopalpa neonata	BIOUG06258-D12	LOCBF713-13	588[0n]	KY442089	BOLD:ABW8320				BIOUG	N. Bloomfield	23	3	2013				United States	California	Imperial County	Sidewinder Road		32.8169	-114.815		BL
Neopalpa neonata	BIOUG06258-E04	LOCBF717-13	546[0n]	KY442182	BOLD:ABW8320				BIOUG	N. Bloomfield	23	3	2013				United States	California	Imperial County	Sidewinder Road		32.8169	-114.815		BL
Neopalpa neonata	BIOUG06258-E09	LOCBF722-13	576[0n]	KY442125	BOLD:ABW8320				BIOUG	N. Bloomfield	23	3	2013				United States	California	Imperial County	Sidewinder Road		32.8169	-114.815		BL
Neopalpa neonata	BIOUG06258-F02	LOCBF727-13	524[4n]	KY442255	BOLD:ABW8320				BIOUG	N. Bloomfield	23	3	2013				United States	California	Imperial County	Sidewinder Road		32.8169	-114.815		BL
Neopalpa neonata	BIOUG06258-F05	LOCBF730-13	552[0n]	KY442113	BOLD:ABW8320				BIOUG	N. Bloomfield	23	3	2013				United States	California	Imperial County	Sidewinder Road		32.8169	-114.815		BL
Neopalpa neonata	BIOUG06258-F11	LOCBF736-13	576[0n]	KY442212	BOLD:ABW8320				BIOUG	N. Bloomfield	23	3	2013				United States	California	Imperial County	Sidewinder Road		32.8169	-114.815		BL
Neopalpa neonata	BIOUG06242-G01	LOCBF761-13	658[0n]	KY442088	BOLD:ABW8320				BIOUG	N. Bloomfield	10	3	2013				United States	California	Imperial County	Sidewinder Road		32.8169	-114.815		BL
Neopalpa neonata	BIOUG06242-G04	LOCBF764-13	658[0n]	KY442202	BOLD:ABW8320				BIOUG	N. Bloomfield	10	3	2013				United States	California	Imperial County	Sidewinder Road		32.8169	-114.815		BL
Neopalpa neonata	BIOUG06242-G05	LOCBF765-13	591[0n]	KY442141	BOLD:ABW8320				BIOUG	N. Bloomfield	10	3	2013				United States	California	Imperial County	Sidewinder Road		32.8169	-114.815		BL
Neopalpa neonata	BIOUG06242-G07	LOCBF767-13	590[1n]	KY442225	BOLD:ABW8320				BIOUG	N. Bloomfield	10	3	2013				United States	California	Imperial County	Sidewinder Road		32.8169	-114.815		BL
Neopalpa neonata	BIOUG06242-G08	LOCBF768-13	554[0n]	KY442071	BOLD:ABW8320	MIC	7130	M	BIOUG	N. Bloomfield	10	3	2013				United States	California	Imperial County	Sidewinder Road		32.8169	-114.815		BL
Neopalpa neonata	BIOUG06242-G09	LOCBF769-13	531[0n]	KY442084	BOLD:ABW8320				BIOUG	N. Bloomfield	10	3	2013				United States	California	Imperial County	Sidewinder Road		32.8169	-114.815		BL
Neopalpa neonata	BIOUG06242-G10	LOCBF770-13	575[0n]	KY442073	BOLD:ABW8320				BIOUG	N. Bloomfield	10	3	2013				United States	California	Imperial County	Sidewinder Road		32.8169	-114.815		BL
Neopalpa neonata	BIOUG06242-H01	LOCBF773-13	583[0n]	KY442161	BOLD:ABW8320				BIOUG	N. Bloomfield	10	3	2013				United States	California	Imperial County	Sidewinder Road		32.8169	-114.815		BL
Neopalpa neonata	BIOUG06242-H03	LOCBF775-13	581[0n]	KY442206	BOLD:ABW8320				BIOUG	N. Bloomfield	10	3	2013				United States	California	Imperial County	Sidewinder Road		32.8169	-114.815		BL
Neopalpa neonata	BIOUG06242-H04	LOCBF776-13	540[0n]	KY442145	BOLD:ABW8320				BIOUG	N. Bloomfield	10	3	2013				United States	California	Imperial County	Sidewinder Road		32.8169	-114.815		BL
Neopalpa neonata	BIOUG06242-H06	LOCBF778-13	540[0n]	KY442076	BOLD:ABW8320				BIOUG	N. Bloomfield	10	3	2013				United States	California	Imperial County	Sidewinder Road		32.8169	-114.815		BL
Neopalpa neonata	BIOUG06242-H08	LOCBF780-13	582[0n]	KY442105	BOLD:ABW8320				BIOUG	N. Bloomfield	10	3	2013				United States	California	Imperial County	Sidewinder Road		32.8169	-114.815		BL
Neopalpa neonata	BIOUG06242-H09	LOCBF781-13	566[0n]	KY442117	BOLD:ABW8320				BIOUG	N. Bloomfield	10	3	2013				United States	California	Imperial County	Sidewinder Road		32.8169	-114.815		BL
Neopalpa neonata	BIOUG06259-C10	LOCBF817-13	599[0n]	KY442233	BOLD:ABW8320				BIOUG	N. Bloomfield	23	3	2013				United States	California	Imperial County	Sidewinder Road		32.8169	-114.815		BL
Neopalpa neonata	BIOUG06259-D03	LOCBF822-13	552[0n]	KY442197	BOLD:ABW8320				BIOUG	N. Bloomfield	23	3	2013				United States	California	Imperial County	Sidewinder Road		32.8169	-114.815		BL
Neopalpa neonata	BIOUG06259-D08	LOCBF827-13	547[2n]	KY442291	BOLD:ABW8320				BIOUG	N. Bloomfield	23	3	2013				United States	California	Imperial County	Sidewinder Road		32.8169	-114.815		BL
Neopalpa neonata	BIOUG06259-E02	LOCBF833-13	549[3n]	KY442170	BOLD:ABW8320				BIOUG	N. Bloomfield	23	3	2013				United States	California	Imperial County	Sidewinder Road		32.8169	-114.815		BL
Neopalpa neonata	BIOUG06259-E03	LOCBF834-13	528[0n]	KY442157	BOLD:ABW8320				BIOUG	N. Bloomfield	23	3	2013				United States	California	Imperial County	Sidewinder Road		32.8169	-114.815		BL
Neopalpa neonata	BIOUG06259-E05	LOCBF836-13	564[0n]	KY442150	BOLD:ABW8320				BIOUG	N. Bloomfield	23	3	2013				United States	California	Imperial County	Sidewinder Road		32.8169	-114.815		BL
Neopalpa neonata	BIOUG06259-E06	LOCBF837-13	546[0n]	KY442211	BOLD:ABW8320				BIOUG	N. Bloomfield	23	3	2013				United States	California	Imperial County	Sidewinder Road		32.8169	-114.815		BL
Neopalpa neonata	BIOUG06259-E08	LOCBF839-13	546[0n]	KY442074	BOLD:ABW8320				BIOUG	N. Bloomfield	23	3	2013				United States	California	Imperial County	Sidewinder Road		32.8169	-114.815		BL
Neopalpa neonata	BIOUG06259-F09	LOCBF852-13	591[0n]	KY442243	BOLD:ABW8320				BIOUG	N. Bloomfield	10	3	2013				United States	California	Imperial County	Sidewinder Road		32.8169	-114.815		BL
Neopalpa neonata	BIOUG06259-F10	LOCBF853-13	545[1n]	KY442279	BOLD:ABW8320				BIOUG	N. Bloomfield	10	3	2013				United States	California	Imperial County	Sidewinder Road		32.8169	-114.815		BL
Neopalpa neonata	BIOUG06259-F11	LOCBF854-13	591[0n]	KY442107	BOLD:ABW8320				BIOUG	N. Bloomfield	10	3	2013				United States	California	Imperial County	Sidewinder Road		32.8169	-114.815		BL
Neopalpa neonata	BIOUG06259-F12	LOCBF855-13	534[0n]	KY442079	BOLD:ABW8320				BIOUG	N. Bloomfield	10	3	2013				United States	California	Imperial County	Sidewinder Road		32.8169	-114.815		BL
Neopalpa neonata	BIOUG06259-G01	LOCBF856-13	546[0n]	KY442188	BOLD:ABW8320				BIOUG	N. Bloomfield	10	3	2013				United States	California	Imperial County	Sidewinder Road		32.8169	-114.815		BL
Neopalpa neonata	BIOUG06259-G02	LOCBF857-13	591[0n]	KY442281	BOLD:ABW8320				BIOUG	N. Bloomfield	10	3	2013				United States	California	Imperial County	Sidewinder Road		32.8169	-114.815		BL
Neopalpa neonata	BIOUG06259-G03	LOCBF858-13	591[0n]	KY442240	BOLD:ABW8320				BIOUG	N. Bloomfield	10	3	2013				United States	California	Imperial County	Sidewinder Road		32.8169	-114.815		BL
Neopalpa neonata	BIOUG06259-G04	LOCBF859-13	591[0n]	KY442081	BOLD:ABW8320				BIOUG	N. Bloomfield	10	3	2013				United States	California	Imperial County	Sidewinder Road		32.8169	-114.815		BL
Neopalpa neonata	BIOUG06259-G05	LOCBF860-13	591[0n]	KY442177	BOLD:ABW8320				BIOUG	N. Bloomfield	10	3	2013				United States	California	Imperial County	Sidewinder Road		32.8169	-114.815		BL
Neopalpa neonata	BIOUG06259-G06	LOCBF861-13	552[0n]	KY442231	BOLD:ABW8320				BIOUG	N. Bloomfield	10	3	2013				United States	California	Imperial County	Sidewinder Road		32.8169	-114.815		BL
Neopalpa neonata	BIOUG06259-G07	LOCBF862-13	543[0n]	KY442216	BOLD:ABW8320				BIOUG	N. Bloomfield	10	3	2013				United States	California	Imperial County	Sidewinder Road		32.8169	-114.815		BL
Neopalpa neonata	BIOUG06259-G08	LOCBF863-13	549[0n]	KY442070	BOLD:ABW8320				BIOUG	N. Bloomfield	10	3	2013				United States	California	Imperial County	Sidewinder Road		32.8169	-114.815		BL
Neopalpa neonata	BIOUG06259-G09	LOCBF864-13	576[0n]	KY442207	BOLD:ABW8320				BIOUG	N. Bloomfield	10	3	2013				United States	California	Imperial County	Sidewinder Road		32.8169	-114.815		BL
Neopalpa neonata	BIOUG06259-G10	LOCBF865-13	591[0n]	KY442220	BOLD:ABW8320				BIOUG	N. Bloomfield	10	3	2013				United States	California	Imperial County	Sidewinder Road		32.8169	-114.815		BL
Neopalpa neonata	BIOUG06259-G11	LOCBF866-13	593[0n]	KY442156	BOLD:ABW8320				BIOUG	N. Bloomfield	10	3	2013				United States	California	Imperial County	Sidewinder Road		32.8169	-114.815		BL
Neopalpa neonata	BIOUG06259-G12	LOCBF867-13	552[0n]	KY442263	BOLD:ABW8320				BIOUG	N. Bloomfield	10	3	2013				United States	California	Imperial County	Sidewinder Road		32.8169	-114.815		BL
Neopalpa neonata	BIOUG06259-H05	LOCBF872-13	546[0n]	KY442246	BOLD:ABW8320				BIOUG	N. Bloomfield	10	3	2013				United States	California	Imperial County	Sidewinder Road		32.8169	-114.815		BL
Neopalpa neonata	BIOUG06259-H06	LOCBF873-13	552[0n]	KY442134	BOLD:ABW8320				BIOUG	N. Bloomfield	10	3	2013				United States	California	Imperial County	Sidewinder Road		32.8169	-114.815		BL
Neopalpa neonata	CNCLEP00077350	MNAO175-11	407[0n]	KY442191	BOLD:ABW8320	MIC	6530	F	CNC	J.-F. Landry	23	5	1984				United States	California	Santa Barbara County	Santa Cruz Island	Cascada	34.005	-119.753		BL
Neopalpa neonata	EMEC82306	MNAP576-13	0			Pw	1168	M	EMEC	J.A. Chemsak	5	2	1978				United States	California	Los Angeles County	Santa Catalina Island	Middle Canyon	33.348	-118.407	500	Holotype | BL
Neopalpa neonata	EMEC342305	MNAP577-13	0			Pw	1173	M	EMEC	J.A. Powell	8	9	1966				Mexico	Baja California Sur			21 mi. W. La Paz	24.053	-110.577		Paratype
Neopalpa neonata	BIOUG16291-G07	SDRAJ078-14	591[0n]	KY442143	BOLD:ABW8320				BIOUG	Joshua Kohn	14	2	2014				United States	California	San Diego County	San Dieguito River Valley Conservancy	Site 4 (Safari Park)	33.097	-116.996	145	Malaise trap
Neopalpa neonata	BIOUG16319-H09	SDRAM138-14	582[0n]	KY442275	BOLD:ABW8320				BIOUG	Joshua Kohn	23	5	2014				United States	California	San Diego County	San Dieguito River Valley Conservancy	Site 1 (Santa Ysabel)	33.115	-116.601	1185.18	Malaise trap
Neopalpa neonata	BIOUG16394-H11	SDRAS748-14	602[0n]	KY442124	BOLD:ABW8320				BIOUG	Joshua Kohn	30	5	2014				United States	California	San Diego County	San Dieguito River Valley Conservancy	Site 1 (Santa Ysabel)	33.115	-116.601	1185.18	Malaise trap
Neopalpa neonata	BIOUG08839-D09	SDRVA636-13	591[0n]	KY442236	BOLD:ABW8320				BIOUG	Joshua Kohn	23	8	2013				United States	California	San Diego County	San Dieguito River Valley Conservancy	Site 1 (Volcan Mtn)	33.115	-116.601	1185.18	Collection 1
Neopalpa neonata	BIOUG08839-H04	SDRVA679-13	555[0n]	KY442162	BOLD:ABW8320				BIOUG	Joshua Kohn	23	8	2013				United States	California	San Diego County	San Dieguito River Valley Conservancy	Site 1 (Volcan Mtn)	33.115	-116.601	1185.18	Collection 1
Neopalpa neonata	BIOUG08839-H05	SDRVA680-13	588[0n]	KY442066	BOLD:ABW8320				BIOUG	Joshua Kohn	23	8	2013				United States	California	San Diego County	San Dieguito River Valley Conservancy	Site 1 (Volcan Mtn)	33.115	-116.601	1185.18	Collection 1
Neopalpa neonata	BIOUG08849-A10	SDRVA696-13	592[0n]	KY442244	BOLD:ABW8320				BIOUG	Joshua Kohn	23	8	2013				United States	California	San Diego County	San Dieguito River Valley Conservancy	Site 1 (Volcan Mtn)	33.115	-116.601	1185.18	Collection 1
Neopalpa neonata	BIOUG08849-B02	SDRVA700-13	588[0n]	KY442164	BOLD:ABW8320				BIOUG	Joshua Kohn	23	8	2013				United States	California	San Diego County	San Dieguito River Valley Conservancy	Site 1 (Volcan Mtn)	33.115	-116.601	1185.18	Collection 1
Neopalpa neonata	BIOUG13768-A09	SDRVO080-14	543[0n]	KY442199	BOLD:ABW8320				BIOUG	Joshua Kohn	15	11	2013				United States	California	San Diego County	San Dieguito River Valley Conservancy	Site 2 (Sutherland Dam)	33.12	-116.785	596.86
Neopalpa neonata	BIOUG13770-F09	SDRVO287-14	582[0n]	KY442184	BOLD:ABW8320				BIOUG	Joshua Kohn	15	11	2013				United States	California	San Diego County	San Dieguito River Valley Conservancy	Site 2 (Sutherland Dam)	33.12	-116.785	596.86
Neopalpa neonata	BIOUG13801-B02	SDRVO327-14	591[0n]	KY442245	BOLD:ABW8320				BIOUG	Joshua Kohn	15	11	2013				United States	California	San Diego County	San Dieguito River Valley Conservancy	Site 2 (Sutherland Dam)	33.12	-116.785	596.86
Neopalpa neonata	BIOUG13801-B05	SDRVO330-14	564[0n]	KY442067	BOLD:ABW8320				BIOUG	Joshua Kohn	15	11	2013				United States	California	San Diego County	San Dieguito River Valley Conservancy	Site 2 (Sutherland Dam)	33.12	-116.785	596.86
Neopalpa neonata	BIOUG15684-F11	SDRVZ544-14	510[0n]	KY442176	BOLD:ABW8320				BIOUG	Joshua Kohn	30	8	2013				United States	California	San Diego County	San Dieguito River Valley Conservancy	Site 1 (Santa Ysabel)	33.115	-116.601	1185.18	Collection 2
Neopalpa neonata	BIOUG15686-F09	SDRVZ732-14	582[0n]	KY442078	BOLD:ABW8320				BIOUG	Joshua Kohn	30	8	2013				United States	California	San Diego County	San Dieguito River Valley Conservancy	Site 1 (Santa Ysabel)	33.115	-116.601	1185.18	Collection 2
Neopalpa neonata	BIOUG15686-G01	SDRVZ736-14	591[0n]	KY442151	BOLD:ABW8320				BIOUG	Joshua Kohn	30	8	2013				United States	California	San Diego County	San Dieguito River Valley Conservancy	Site 1 (Santa Ysabel)	33.115	-116.601	1185.18	Collection 2
Neopalpa neonata	CNCLEP00117211							M	CAS	P.H. Arnaud Jr.	2	3	1963				Mexico	Sonora	Bahia San Carlos			27.9452	-111.062
Neopalpa neonata	CNCLEP00117215							M	CAS	P.H. Arnaud Jr.	17	2	1963				Mexico	Sonora	Bahia San Carlos			27.9452	-111.062
Neopalpa neonata	CNCLEP00117216							F	CAS	P.H. Arnaud Jr.	17	2	1963				Mexico	Sonora	Bahia San Carlos			27.9452	-111.062
Neopalpa neonata	CNCLEP00117218							M	CAS	P.H. Arnaud Jr.	17	2	1963				Mexico	Sonora	Bahia San Carlos			27.9452	-111.062
Neopalpa neonata	CNCLEP00117219							M	CAS	P.H. Arnaud Jr.	17	2	1963				Mexico	Sonora	Bahia San Carlos			27.9452	-111.062
Neopalpa neonata	CNCLEP00117220							F	CAS	P.H. Arnaud Jr.	17	2	1963				Mexico	Sonora	Bahia San Carlos			27.9452	-111.062
Neopalpa neonata	CNCLEP00117226							F	CAS	Don Patterson	14	11	1967				Mexico	Baja California		7 mi W. Las Arrastras de Arriola		29.7139	-114.532
Neopalpa neonata	CNCLEP00117227							M	CAS	Don Patterson	14	11	1967				Mexico	Baja California		7 mi W. Las Arrastras de Arriola		29.7139	-114.532
Neopalpa neonata	CNCLEP00117228							F	CAS	Don Patterson	14	11	1967				Mexico	Baja California		7 mi W. Las Arrastras de Arriola		29.7139	-114.532
Neopalpa neonata	CNCLEP00117230							M	CAS	Don Patterson	14	11	1967				Mexico	Baja California		7 mi W. Las Arrastras de Arriola		29.7139	-114.532
Neopalpa neonata	CNCLEP00117231							M	CAS	Don Patterson	14	11	1967				Mexico	Baja California		7 mi W. Las Arrastras de Arriola		29.7139	-114.532
Neopalpa neonata	CNCLEP00117232							F	CAS	Don Patterson	14	11	1967				Mexico	Baja California		7 mi W. Las Arrastras de Arriola		29.7139	-114.532
Neopalpa neonata	CNCLEP00117233							M	CAS	Don Patterson	14	11	1967				Mexico	Baja California		7 mi W. Las Arrastras de Arriola		29.7139	-114.532
Neopalpa neonata	CNCLEP00117234							M	CAS	Don Patterson	14	11	1967				Mexico	Baja California		7 mi W. Las Arrastras de Arriola		29.7139	-114.532
Neopalpa neonata	CNCLEP00117235							F	CAS	Don Patterson	14	11	1967				Mexico	Baja California		7 mi W. Las Arrastras de Arriola		29.7139	-114.532
Neopalpa neonata	CNCLEP00117241							M	CAS	Don Patterson	14	11	1967				Mexico	Baja California		7 mi W. Las Arrastras de Arriola		29.7139	-114.532
Neopalpa neonata	CNCLEP00117242							M	CAS	Don Patterson	14	11	1967				Mexico	Baja California		1 mi up canyon 3 mi S of Oakie landing		29.9664	-114.573
Neopalpa neonata	CNCLEP00117243							M	CAS	Don Patterson	14	11	1967				Mexico	Baja California		1 mi up canyon 3 mi S of Oakie landing		29.9664	-114.573
Neopalpa neonata	CNCLEP00117245							F	CAS	Don Patterson	14	11	1967				Mexico	Baja California		1 mi up canyon 3 mi S of Oakie landing		29.9664	-114.573
Neopalpa neonata	CNCLEP00117246							F	CAS	Don Patterson	14	11	1967				Mexico	Baja California		1 mi up canyon 3 mi S of Oakie landing		29.9664	-114.573
Neopalpa neonata	CNCLEP00117247							M	CAS	Don Patterson	14	11	1967				Mexico	Baja California		1 mi up canyon 3 mi S of Oakie landing		29.9664	-114.573
Neopalpa neonata	CNCLEP00117249							F	CAS	Don Patterson	14	11	1967				Mexico	Baja California		1 mi up canyon 3 mi S of Oakie landing		29.9664	-114.573
Neopalpa neonata	CNCLEP00117250							F	CAS	Don Patterson	14	11	1967				Mexico	Baja California		1 mi up canyon 3 mi S of Oakie landing		29.9664	-114.573
Neopalpa neonata	CNCLEP00117251							M	CAS	Don Patterson	14	11	1967				Mexico	Baja California		1 mi up canyon 3 mi S of Oakie landing		29.9664	-114.573
Neopalpa neonata	CNCLEP00117252							M	CAS	Don Patterson	14	11	1967				Mexico	Baja California		1 mi up canyon 3 mi S of Oakie landing		29.9664	-114.573
Neopalpa neonata	CNCLEP00117253							M	CAS	Don Patterson	14	11	1967				Mexico	Baja California		1 mi up canyon 3 mi S of Oakie landing		29.9664	-114.573
Neopalpa neonata	CNCLEP00117254							M	CAS	Don Patterson	14	11	1967				Mexico	Baja California		1 mi up canyon 3 mi S of Oakie landing		29.9664	-114.573
Neopalpa neonata	CNCLEP00117255							M	CAS	Don Patterson	14	11	1967				Mexico	Baja California		1 mi up canyon 3 mi S of Oakie landing		29.9664	-114.573
Neopalpa neonata	CNCLEP00117257							F	CAS	Don Patterson	14	11	1967				Mexico	Baja California		1 mi up canyon 3 mi S of Oakie landing		29.9664	-114.573
Neopalpa neonata	CNCLEP00117258							F	CAS	Don Patterson	14	11	1967				Mexico	Baja California		1 mi up canyon 3 mi S of Oakie landing		29.9664	-114.573
Neopalpa neonata	CNCLEP00117261							M	CAS	Don Patterson	14	11	1967				Mexico	Baja California		1 mi up canyon 3 mi S of Oakie landing		29.9664	-114.573
Neopalpa neonata	CNCLEP00117264							M	CAS	Ken Lucas	11	8	1965				Mexico	Baja California Sur		Isla San Jose		24.0762	-110.304		collected at night in Flight trap
Neopalpa neonata	CNCLEP00117267							M	CAS	Don Patterson	12	11	1967				Mexico	Baja California		54 mi S and 12 mi W on San Felipe Hwy to San Matias Pass		31.3131	-115.488
Neopalpa neonata	CNCLEP00138390					MIC	7591	F	Albu	V+M Albu	22	4	2005				United States	California	Inyo County	Homewood Canvon Rd., Argus Mts.		35.8946	-117.378
Neopalpa neonata	EMEC407543							M (a/l)	EMEC	J.A. Powell	22	5	1984	24	5	1984	United States	California	Santa Barbara County	Santa Cruz Island	"Cascada" W end Central Valley	34.0167	-119.75		BL trap
Neopalpa neonata	EMEC407544					EME	469	F	EMEC	J.A. Powell	26	4	1966				United States	California	Santa Barbara County	Santa Cruz Island	Central Valley Sta.	33.996	-119.719		at light | RW Hodges 4199
Neopalpa neonata	EMEC407545					EME	1138	F	EMEC	J.A. Powell	4	12	1981				United States	California	Los Angeles County	San Clemente Island	Stone Biol. Lab.	32.922	-118.507		at light | Pw.5701
Neopalpa neonata	EMEC407546					EME	6462	F	EMEC	Y.F. Hsu	28	4	1993				United States	California	Riverside County	Corvina Beach		33.4763	-115.889	-220'	Pw.1180
Neopalpa neonata	EMEC407907							M	EMEC	J.A. Powell	27	3	2002				United States	California	San Diego County	SW of Lake Morena	Hauser Cyn.	32.674	-116.567	640-700	BL trap
Neopalpa neonata	EMEC407960							M	EMEC	R.H. Leuschner	23	5	1995				United States	California	Riverside County	Pinyon Crest		33.6086	-116.437	4200'
Neopalpa neonata	EMEC408097							M	EMEC	J.A. Powell & F.A.H. Sperling	26	6	1998	27	6	1998	United States	California	San Bernardino County	Grace Vy Ranch	nr. Onyx Summit	34.1922	-116.719	2475	BL
Neopalpa neonata	EMEC408122							F	EMEC	R.E. Dietz & J.A. Powell	29	3	1978				United States	California	San Diego County	Elephant Tree area	6 mi SE Ocotillo Wells	33.0868	-116.057		at light
Neopalpa neonata	EMEC408123							F	EMEC	R.E. Dietz & J.A. Powell	29	3	1978				United States	California	San Diego County	Elephant Tree area	6 mi SE Ocotillo Wells	33.0868	-116.057		at light
Neopalpa neonata	EMEC408124								EMEC	R.E. Dietz & J.A. Powell	29	3	1978				United States	California	San Diego County	Elephant Tree area	6 mi SE Ocotillo Wells	33.0868	-116.057		at light
Neopalpa neonata	EMEC408131								EMEC	P.A. Opler	14	9	1968				United States	California	San Diego County	Burnt Ranchera Cmpgrd		32.8614	-116.417		at light
Neopalpa neonata	EMEC408327								EMEC	J.A. Powell	2	4	1973				Mexico	Baja California	24 mi N Punta Prieta			29.2689	-114.199
Neopalpa neonata	EMEC408334							F	EMEC	Paul DeBach	7	4	1982	12	4	1982	Mexico	Baja California Sur	Las Barracas	ca. 30 km E Santiago		23.4752	-109.454		Malaise trap
Neopalpa neonata	EMEC408350							M	EMEC	J.T. Doyen	14	6	1973				Mexico	Baja California	3 mi S San Augustin			29.9502	-114.995		BL & White lights
Neopalpa neonata	EMEC408351								EMEC	J.T. Doyen	14	6	1973				Mexico	Baja California	3 mi S San Augustin			29.9502	-114.995		BL & White lights
Neopalpa neonata	EMEC408352								EMEC	J.T. Doyen	14	6	1973				Mexico	Baja California	3 mi S San Augustin			29.9502	-114.995		BL & White lights
Neopalpa neonata	EMEC408353								EMEC	J.T. Doyen	14	6	1973				Mexico	Baja California	3 mi S San Augustin			29.9502	-114.995		BL & White lights
Neopalpa neonata	EMEC408354								EMEC	J.T. Doyen	14	6	1973				Mexico	Baja California	3 mi S San Augustin			29.9502	-114.995		BL & White lights
Neopalpa neonata	EMEC408355								EMEC	J.T. Doyen	14	6	1973				Mexico	Baja California	3 mi S San Augustin			29.9502	-114.995		BL & White lights
Neopalpa neonata	EMEC408356								EMEC	J.T. Doyen	14	6	1973				Mexico	Baja California	3 mi S San Augustin			29.9502	-114.995		BL & White lights
Neopalpa neonata	EMEC408357								EMEC	J.T. Doyen	14	6	1973				Mexico	Baja California	3 mi S San Augustin			29.9502	-114.995		BL & White lights
Neopalpa neonata	EMEC408358								EMEC	J.T. Doyen	14	6	1973				Mexico	Baja California	3 mi S San Augustin			29.9502	-114.995		BL & White lights
Neopalpa neonata	EMEC408359								EMEC	J.T. Doyen	14	6	1973				Mexico	Baja California	3 mi S San Augustin			29.9502	-114.995		BL & White lights
Neopalpa neonata	EMEC408360								EMEC	J.T. Doyen	14	6	1973				Mexico	Baja California	3 mi S San Augustin			29.9502	-114.995		BL & White lights
Neopalpa neonata	EMEC408361								EMEC	J.T. Doyen	14	6	1973				Mexico	Baja California	3 mi S San Augustin			29.9502	-114.995		BL & White lights
Neopalpa neonata	EMEC408362								EMEC	J.T. Doyen	14	6	1973				Mexico	Baja California	3 mi S San Augustin			29.9502	-114.995		BL & White lights
Neopalpa neonata	EMEC408363								EMEC	J.T. Doyen	14	6	1973				Mexico	Baja California	3 mi S San Augustin			29.9502	-114.995		BL & White lights
Neopalpa neonata	EMEC408368								EMEC	D. Spencer, R.J. & A. Ryckman	20	5	1962				Mexico	Baja California	Gulf of Baja California	Salsipuedes Island		28.87	-113.04		at light
Neopalpa neonata	EMEC408370								EMEC	J.T. Doyen	14	6	1973				Mexico	Baja California	3 mi S San Augustin			29.9502	-114.995		BL & White lights
Neopalpa neonata	EMEC408372								EMEC	R.E. Dietz & P. Guins	4	6	1973				Mexico	Sonora	Bahia Kino			28.8266	-111.949		BL
Neopalpa neonata	EMEC408417								EMEC	C.W. O'Brian	24	3	1964				United States	Arizona	Pima County	Organ Pipe Nat. Monument		32.0878	-112.906
Neopalpa neonata	EMEC408422								EMEC	P.A. Opler & J.A. Powell	3	6	1968				United States	Arizona	Coconino County	Oak Creek Canyon	Manzanita Campground	34.9384	-111.749		BL & White lights
Neopalpa neonata	EMEC408430								EMEC	Y.F. Hsu, J.A. Powell & M. Prentice	20	7	1989				United States	Arizona	Coconino County	12 mi SE Kingman	Hualapai Mountain Park	35.0816	-113.876	6000'
Neopalpa neonata	EMEC408456								EMEC	J.A. Powell	3	7	1972				United States	Arizona	Cochise County	Chiricahua Mts.	Rustler Park	31.3721	-109.578	8500'	at light
Neopalpa neonata	EMEC408458								EMEC	J.A. Powell	20	7	1972				United States	Arizona	Cochise County	Chiricahua Mts.	Rustler Park	31.3721	-109.578	8500'	at light
Neopalpa neonata	EMEC408464								EMEC	J.A. Powell	5	8	1991				United States	Arizona	Cochise County	Chiricahua Mts.	Barfoot Park	31.9151	-109.285	8300'
Neopalpa neonata	EMEC408470								EMEC	J.T. Doyen	14	6	1973				Mexico	Baja California	3 mi S San Augustin			29.9502	-114.995		BL & White lights
Neopalpa neonata	EMEC408476							M	EMEC	S.L. Szerlip, J.A. Powell & J. Donohue	1	4	1973	2	4	1973	Mexico	Baja California	24 mi N Punta Prieta			29.2454	-114.149		BL
Neopalpa neonata	EMEC408477								EMEC	S.L. Szerlip, J.A. Powell & J. Donohue	1	4	1973	2	4	1973	Mexico	Baja California	24 mi N Punta Prieta			29.2454	-114.149		BL
Neopalpa neonata	EMEC408480							M	EMEC	S.L. Szerlip, J.A. Powell & J. Donohue	1	4	1973	2	4	1973	Mexico	Baja California	24 mi N Punta Prieta			29.2454	-114.149		BL
Neopalpa neonata	EMEC408481							F	EMEC	S.L. Szerlip, J.A. Powell & J. Donohue	1	4	1973	2	4	1973	Mexico	Baja California	24 mi N Punta Prieta			29.2454	-114.149		BL
Neopalpa neonata	EMEC408482							M	EMEC	S.L. Szerlip, J.A. Powell & J. Donohue	1	4	1973	2	4	1973	Mexico	Baja California	24 mi N Punta Prieta			29.2454	-114.149		BL
Neopalpa neonata	EMEC408518								EMEC	Paul DeBach	8	5	1983	12	5	1983	Mexico	Baja California Sur	Las Barracas	ca. 30 km E Santiago		23.4752	-109.454		Malaise trap
Neopalpa neonata	EMEC408524							F	EMEC	R.E. Dietz	26	12	1978				Mexico	Baja California	Bahia Los Angeles	4 km NW		28.9852	-113.619		UVL
Neopalpa neonata	EMEC408526							F	EMEC	J.A. Powell & J.A. DeBenedictis	20	7	1979				United States	California	Los Angeles County	Table Mt.	1 air km N Big Pines	34.3876	-117.69	7200'	BL
Neopalpa neonata	EMEC408527							M	EMEC	J.A. Powell & J.A. DeBenedictis	20	7	1979				United States	California	Los Angeles County	Table Mt.	1 air km N Big Pines	34.3876	-117.69	7200'	BL
Neopalpa neonata	EMEC408528							M	EMEC	J.A. Powell & J.A. DeBenedictis	20	7	1979				United States	California	Los Angeles County	Table Mt.	1 air km N Big Pines	34.3876	-117.69	7200'	BL
Neopalpa neonata	EMEC408536							M	EMEC	J.A. Powell & J.A. DeBenedictis	20	7	1979				United States	California	Los Angeles County	Table Mt.	1 air km N Big Pines	34.3876	-117.69	7200'	BL
Neopalpa neonata	EMEC408544							M	EMEC	J.A. Powell & J.A. DeBenedictis	20	7	1979				United States	California	Los Angeles County	Table Mt.	1 air km N Big Pines	34.3876	-117.69	7200'	BL
Neopalpa neonata	EMEC408569								EMEC	Y.F. Hsu	28	4	1993				United States	California	Riverside County	Corvina Beach	E shore of Salton Sea	33.4763	-115.889	-220'
Neopalpa neonata	EMEC408575							M	EMEC	R.H. Leuschner	2	4	1990				United States	California	Riverside County	P.L. Boyd Desert Research Center	3.5 miles S. Palm Desert	33.648	-116.376
Neopalpa neonata	EMEC408616							M	EMEC	N. Bloomfield	11	1	1999	12	1	1999	United States	California	Imperial County	Sidewinder Road	7 mi N Hwy 8	32.8169	-114.815		BL
Neopalpa neonata	EMEC408617								EMEC	N. Bloomfield	11	1	1999	12	1	1999	United States	California	Imperial County	Sidewinder Road	7 mi N Hwy 8	32.8169	-114.815		BL
Neopalpa neonata	EMEC408619							M	EMEC	N. Bloomfield	11	1	1999	12	1	1999	United States	California	Imperial County	Sidewinder Road	7 mi N Hwy 8	32.8169	-114.815		BL
Neopalpa neonata	EMEC408623							M	EMEC	N. Bloomfield	11	1	1999	12	1	1999	United States	California	Imperial County	Sidewinder Road	7 mi N Hwy 8	32.8169	-114.815		BL
Neopalpa neonata	EMEC408627								EMEC	N. Bloomfield	11	1	1999	12	1	1999	United States	California	Imperial County	Sidewinder Road	7 mi N Hwy 8	32.8169	-114.815		BL
Neopalpa neonata	EMEC408631							M	EMEC	N. Bloomfield	11	1	1999	12	1	1999	United States	California	Imperial County	Sidewinder Road	7 mi N Hwy 8	32.8169	-114.815		BL
Neopalpa neonata	EMEC408634								EMEC	N. Bloomfield	11	1	1999	12	1	1999	United States	California	Imperial County	Sidewinder Road	7 mi N Hwy 8	32.8169	-114.815		BL
Neopalpa neonata	EMEC408639								EMEC	D. & J.A. Powell	27	6	1978				United States	California	Imperial County	17 mi NW Glamis		33.1514	-115.306		BL trap
Neopalpa neonata	EMEC408849					VNZ	591	F	EMEC	P.A. Opler & J.A. Powell	23	7	1968				United States	California	Modoc County	Cedar Pass Campground		41.5593	-120.294	5900'	BL & White lights
Neopalpa neonata	LACMENT275378							M	LACM	J.P. & K.E.S. Donahue	30	12	1989	31	12	1989	United States	California	Imperial County	Cargo Muchacho Mts.	T15S R21E sec9	36.6416	-119.691	820'	#142767
Neopalpa neonata	LACMENT326621								LACM	Jerry Freilich	31	5	1992				United States	California	San Bernardino County	Burns Pinyon Ridge Res., 2.5 air mi N Yucca Valley	T1N R6E NW1/4 Sec 27	40.443	-123.495	4100'
Neopalpa neonata	LACMENT326626								LACM	J.P. & K.E.S. Donahue	23	3	1991				United States	California	San Diego County	Anza Borrego Desert SP, Fish Creek CG	T13S R8E SE Sec 24	36.7816	-121.04	320'	#151950
Neopalpa neonata	LACMENT326628								LACM	J.P. & K.E.S. Donahue	25	4	1992				United States	California	Riverside County	Chuckwalla bench, Augustine Pass road	T8S R16E W1/2 Sec 13	37.2425	-120.18	2300'	#157484
Neopalpa neonata	LACMENT326710							M	LACM	J.P. & K.E.S. Donahue	25	3	1990				United States	California	Riverside County	S side Orocopia Mts.	T7S R13E SW 1/4 S 30	37.2878	-120.597	900'	#2911
Neopalpa neonata	LACMENT326711								LACM	J.P. & K.E.S. Donahue	24	3	1990				United States	California	Riverside County	S side Chuckwalla Mts.	T7S R15E Sec22	37.3096	-120.316	2350'	#2873
Neopalpa neonata	LACMENT326744								LACM	J.P. & K.E.S. Donahue	28	5	1988	29	5	1988	United States	California	San Bernardino County	nr Sunflower Wash, Old Woman Mts.	T5N R18E SW 1/4 Sec 5	38.3081	-120.028	3300'	#121578
Neopalpa neonata	LACMENT326762								LACM	J.P. & K.E.S. Donahue	30	12	1989	31	12	1989	United States	California	Imperial County	Cargo Muchacho Mts.	T15S R21E sec9	36.6416	-119.691	820'	#142767
Neopalpa neonata	LACMENT326764								LACM	J.P. & K.E.S. Donahue	30	12	1989	31	12	1989	United States	California	Imperial County	Cargo Muchacho Mts.	T15S R21E sec9	36.6416	-119.691	820'	#142767
Neopalpa neonata	LACMENT326765							M	LACM	J.P. & K.E.S. Donahue	30	12	1989	31	12	1989	United States	California	Imperial County	Cargo Muchacho Mts.	T15S R21E sec9	36.6416	-119.691	820'	#142767
Neopalpa neonata	LACMENT326766								LACM	J.P. & K.E.S. Donahue	30	12	1989	31	12	1989	United States	California	Imperial County	Cargo Muchacho Mts.	T15S R21E sec9	36.6416	-119.691	820'	#142767
Neopalpa neonata	LACMENT326767								LACM	J.P. & K.E.S. Donahue	30	12	1989	31	12	1989	United States	California	Imperial County	Cargo Muchacho Mts.	T15S R21E sec9	36.6416	-119.691	820'	#142767
Neopalpa neonata	LACMENT326768							M	LACM	J.P. & K.E.S. Donahue	30	12	1989	31	12	1989	United States	California	Imperial County	Cargo Muchacho Mts.	T15S R21E sec9	36.6416	-119.691	820'	#142767
Neopalpa neonata	LACMENT326778								LACM	J.P. & K.E.S. Donahue	30	12	1989	31	12	1989	United States	California	Imperial County	Cargo Muchacho Mts.	T15S R21E sec9	36.6416	-119.691	820'	#142767
Neopalpa neonata	LACMENT326841								LACM	J.P. & K.E.S. Donahue	15	2	1986	16	2	1986	United States	California	Riverside County	Chuckwalla bench, Corn Springs Wash, 2 air mi W Corn Spring	T6S R16E SW1/4 Sec 19	37.3888	-120.269	1900'	#99486
Neopalpa neonata	LACMENT326877							F	LACM	J.P. & K.E.S. Donahue	23	3	1991				United States	California	San Diego County	Anza Borrego Desert SP, Fish Creek CG	T13S R8E SE Sec 24	36.7816	-121.04	320'	#151950
Neopalpa neonata	LACMENT326878							F	LACM	J.P. & K.E.S. Donahue	23	3	1991				United States	California	San Diego County	Anza Borrego Desert SP, Fish Creek CG	T13S R8E SE Sec 24	36.7816	-121.04	320'	#151950
Neopalpa neonata	LACMENT326882							M	LACM	J.P. & K.E.S. Donahue	1	9	1985				Mexico	Baja California	Vallecitos	Parque Nacional Sierra San Pedro Martir		30.8669	-115.568	7600'	#96055
Neopalpa neonata	LACMENT326883							M	LACM	J.P. & K.E.S. Donahue	1	9	1985				Mexico	Baja California	Vallecitos	Parque Nacional Sierra San Pedro Martir		30.8669	-115.568	7600'	#96055
Neopalpa neonata	LACMENT326885							M	LACM	J.P. & K.E.S. Donahue	19	9	1985				Mexico	Baja California	San Felipe Road	0.4 rd mi N KP 260.5 (Hwy. 1) (22.3 rd. mi N Punta Prieta)		29.2454	-114.149	1900'	#98021
Neopalpa neonata	LACMENT326886								LACM	J.P. & K.E.S. Donahue	1	9	1985				Mexico	Baja California	Vallecitos	Parque Nacional Sierra San Pedro Martir		30.8669	-115.568	7600'	#96055
Neopalpa neonata	LACMENT326951								LACM	J.P. & K.E.S. Donahue	25	4	1992				United States	California	Riverside County	Chuckwalla bench, Augustine Pass road	T8S R16E W1/2 Sec 13	37.2425	-120.18	2300'	#157484
Neopalpa neonata	LACMENT326953							F	LACM	J.P. & K.E.S. Donahue	1	1	1987				United States	California	Imperial County	S side Cargo Muchacho Mts., nr. American Girl mine	T15S R21E NW 1/4 S. 19	36.623	-118.436	550'	#105191
Neopalpa neonata	LACMENT326985								LACM	J.P. & K.E.S. Donahue	30	12	1989	31	12	1989	United States	California	Imperial County	Cargo Muchacho Mts.	T15S R21E sec9	36.6416	-119.691	820'	#142767
Neopalpa neonata	LACMENT326986							M	LACM	J.P. & K.E.S. Donahue	30	12	1989	31	12	1989	United States	California	Imperial County	Cargo Muchacho Mts.	T15S R21E sec9	36.6416	-119.691	820'	#142767
Neopalpa neonata	LACMENT326987								LACM	J.P. & K.E.S. Donahue	30	12	1989	31	12	1989	United States	California	Imperial County	Cargo Muchacho Mts.	T15S R21E sec9	36.6416	-119.691	820'	#142767
Neopalpa neonata	LACMENT326988								LACM	J.P. & K.E.S. Donahue	30	12	1989	31	12	1989	United States	California	Imperial County	Cargo Muchacho Mts.	T15S R21E sec9	36.6416	-119.691	820'	#142767
Neopalpa neonata	LACMENT326990								LACM	J.P. & K.E.S. Donahue	30	12	1989	31	12	1989	United States	California	Imperial County	Cargo Muchacho Mts.	T15S R21E sec9	36.6416	-119.691	820'	#142767
Neopalpa neonata	LACMENT326991								LACM	J.P. & K.E.S. Donahue	30	12	1989	31	12	1989	United States	California	Imperial County	Cargo Muchacho Mts.	T15S R21E sec9	36.6416	-119.691	820'	#142767
Neopalpa neonata	LACMENT326992								LACM	J.P. & K.E.S. Donahue	30	12	1989	31	12	1989	United States	California	Imperial County	Cargo Muchacho Mts.	T15S R21E sec9	36.6416	-119.691	820'	#142767
Neopalpa neonata	LACMENT326994								LACM	J.P. & K.E.S. Donahue	30	12	1989	31	12	1989	United States	California	Imperial County	Cargo Muchacho Mts.	T15S R21E sec9	36.6416	-119.691	820'	#142767
Neopalpa neonata	LACMENT326995								LACM	J.P. & K.E.S. Donahue	30	12	1989	31	12	1989	United States	California	Imperial County	Cargo Muchacho Mts.	T15S R21E sec9	36.6416	-119.691	820'	#142767
Neopalpa neonata	LACMENT326996								LACM	J.P. & K.E.S. Donahue	30	12	1989	31	12	1989	United States	California	Imperial County	Cargo Muchacho Mts.	T15S R21E sec9	36.6416	-119.691	820'	#142767
Neopalpa neonata	LACMENT326997								LACM	J.P. & K.E.S. Donahue	30	12	1989	31	12	1989	United States	California	Imperial County	Cargo Muchacho Mts.	T15S R21E sec9	36.6416	-119.691	820'	#142767
Neopalpa neonata	LACMENT326998								LACM	J.P. & K.E.S. Donahue	30	12	1989	31	12	1989	United States	California	Imperial County	Cargo Muchacho Mts.	T15S R21E sec9	36.6416	-119.691	820'	#142767
Neopalpa neonata	LACMENT326999								LACM	J.P. & K.E.S. Donahue	30	12	1989	31	12	1989	United States	California	Imperial County	Cargo Muchacho Mts.	T15S R21E sec9	36.6416	-119.691	820'	#142767
Neopalpa neonata	LACMENT327000								LACM	J.P. & K.E.S. Donahue	30	12	1989	31	12	1989	United States	California	Imperial County	Cargo Muchacho Mts.	T15S R21E sec9	36.6416	-119.691	820'	#142767
Neopalpa neonata	LACMENT329085							M	LACM	J.P. & K.E.S. Donahue	25	4	1992				United States	California	Riverside County	Chuckwalla bench, Augustine Pass road	T8S R16E W1/2 Sec 13	37.2425	-120.18	2300'	#157484
Neopalpa neonata	LACMENT329234							M	LACM	J.P. & K.E.S. Donahue	6	10	1973	8	10	1973	United States	California	San Bernardino County	Fort Piute, E. side of Piute Range	T12N R18E SE1/4 Sec 13	38.8797	-119.9	2800'
Neopalpa neonata	LACMENT329235								LACM	J.P. & K.E.S. Donahue	6	10	1973	8	10	1973	United States	California	San Bernardino County	Fort Piute, E. side of Piute Range	T12N R18E SE1/4 Sec 13	38.8797	-119.9	2800'
Neopalpa neonata	LACMENT329251							F	LACM	J.P. & K.E.S. Donahue	15	6	1973	17	6	1973	United States	California	Riverside County	Chuckwalla Mts., 7.5 mi SE Desert Center	Corn Spring	37.2425	-120.18	1600'
Neopalpa neonata	LACMENT329252							M	LACM	J.P. & K.E.S. Donahue	15	6	1973	17	6	1973	United States	California	Riverside County	Chuckwalla Mts., 7.5 mi SE Desert Center	Corn Spring	37.2425	-120.18	1600'
Neopalpa neonata	UCBMEP0201490								UCBME	K. Lorenzen & T. Zavortnik	24	3	2008	28	3	2008	United States	California	Imperial County	Algodones Sand Dunes, Wash Rd.	6.7 mi SE Hwy 78 at R/R marker 168, 0.7 mi SW; 2008AL32	32.9265	-114.989	360'	light trap
Neopalpa neonata	UCBMEP0201491								UCBME	K. Lorenzen & T. Zavortnik	24	3	2008	28	3	2008	United States	California	Imperial County	Algodones Sand Dunes, Wash Rd.	6.7 mi SE Hwy 78 at R/R marker 168, 0.7 mi SW; 2008AL32	32.9265	-114.989	360'	light trap
Neopalpa neonata	UCBMEP0201494							F	UCBME	K. Lorenzen & T. Zavortnik	24	3	2008	28	3	2008	United States	California	Imperial County	Algodones Sand Dunes, Wash Rd.	6.7 mi SE Hwy 78 at R/R marker 168, 0.7 mi SW; 2008AL32	32.9265	-114.989	360'	light trap
Neopalpa neonata	UCBMEP0201495					VNZ	239	F	UCBME	K. Lorenzen & T. Zavortnik	24	3	2008	28	3	2008	United States	California	Imperial County	Algodones Sand Dunes, Wash Rd.	6.7 mi SE Hwy 78 at R/R marker 168, 0.7 mi SW; 2008AL32	32.9265	-114.989	360'	light trap
Neopalpa neonata	UCBMEP0201496								UCBME	K. Lorenzen & T. Zavortnik	24	3	2008	28	3	2008	United States	California	Imperial County	Algodones Sand Dunes, Wash Rd.	6.7 mi SE Hwy 78 at R/R marker 168, 0.7 mi SW; 2008AL32	32.9265	-114.989	360'	light trap
Neopalpa neonata	UCBMEP0201497							F	UCBME	S.L. Heydon & M. Valainis	24	3	2008	28	3	2008	United States	California	Imperial County	Algodones Sand Dunes	Hwy 3.4 mi H., Gordons Well exit; site 34	32.7568	-114.962	213'	light trap
Neopalpa neonata	UCBMEP0201499							M	UCBME	K. Lorenzen & T. Zavortnik	24	3	2008	28	3	2008	United States	California	Imperial County	Algodones Sand Dunes, Wash Rd.	6.7 mi SE Hwy 78 at R/R marker 168, 0.7 mi SW; 2008AL32	32.9265	-114.989	360'	light trap
Neopalpa neonata	UCBMEP0201500								UCBME	S.L. Heydon & K. Lorenzen	1	5	2008	2	5	2008	United States	California	Imperial County	Algodones Dunes, Mammoth Wash	Niland-Glamis Rd., 10.4 km SE Glamis, 2008AL54	32.9241	-114.986	43	light trap, microphyll forest
Neopalpa neonata	UCBMEP0201501								UCBME	S.L. Heydon & K. Lorenzen	1	5	2008	2	5	2008	United States	California	Imperial County	Algodones Dunes, Mammoth Wash	Niland-Glamis Rd., 10.4 km SE Glamis, 2008AL54	32.9241	-114.986	43	light trap, microphyll forest
Neopalpa neonata	UCBMEP0201502							M	UCBME	S.L. Heydon & K. Lorenzen	1	5	2008	2	5	2008	United States	California	Imperial County	Algodones Dunes, Mammoth Wash	Niland-Glamis Rd., 10.4 km SE Glamis, 2008AL54	32.9241	-114.986	43	light trap, microphyll forest
Neopalpa neonata	UCBMEP0201503								UCBME	Bohart Museum Team	1	5	2008	2	5	2008	United States	California	Imperial County	Algodones Sand Dunes	Niland-Glamis Rd., 7.4 km NW Hwy 78, Site 31	33.0362	-115.135	275'	light trap
Neopalpa neonata	UCBMEP0201592								UCBME	J.A. DeBenedictis	21	8	1995				United States	California	Solano County	G.L. Stebbins Cold Cyn. Reserve	9 rd mi W. Winters	38.5089	-122.098		UVL + White lights
Neopalpa neonata	UCBMEP0201627								UCBME	Bohart Museum Survey Team	24	3	2008	28	3	2008	United States	California	Imperial County	Algodones Sand Dunes	Buttercup region, 1.6 km ESE Gordon's Well exit @ Hwy 8	32.7583	-114.958		Light trap in Creosote | 2008AL33
Neopalpa neonata	UCBMEP0201651								UCBME	Bohart Museum Survey Team	24	3	2008	28	3	2008	United States	California	Imperial County	Algodones Dunes, Coachella Canal Rd.	4 mi NW Hwy 78	33.0207	-115.225	121'	light trap
Neopalpa neonata	UCIS 299115					VNZ	567	M	UCR	J.B. Tucker	26	4	1975				United States	California	Riverside County	P.L. Boyd Desert Research Center	3.5 miles S. Palm Desert, Coyote Creek	33.648	-116.376
Neopalpa neonata	UCIS 299120								UCR	J.B. Tucker	26	4	1975				United States	California	Riverside County	P.L. Boyd Desert Research Center	3.5 miles S. Palm Desert, Coyote Creek	33.648	-116.376
Neopalpa neonata	UCIS 299124								UCR	J.B. Tucker	26	4	1975				United States	California	Riverside County	P.L. Boyd Desert Research Center	3.5 miles S. Palm Desert, Coyote Creek	33.648	-116.376
Neopalpa neonata	UCIS 299126								UCR	J.B. Tucker	16	4	1975				United States	California	Riverside County	P.L. Boyd Desert Research Center	3.5 miles S. Palm Desert, Coyote Creek	33.648	-116.376
Neopalpa neonata	UCIS 299127								UCR	J.B. Tucker	26	4	1975				United States	California	Riverside County	P.L. Boyd Desert Research Center	3.5 miles S. Palm Desert, Coyote Creek	33.648	-116.376
Neopalpa neonata	UCIS 299763								UCR	J.B. Tucker	10	5	1975				United States	California	Riverside County	P.L. Boyd Desert Research Center	3.5 miles S. Palm Desert, Coyote Creek	33.648	-116.376
Neopalpa neonata	UCIS 299764								UCR	J.B. Tucker	10	5	1975				United States	California	Riverside County	P.L. Boyd Desert Research Center	3.5 miles S. Palm Desert, Coyote Creek	33.648	-116.376
Neopalpa neonata	UCIS 299768								UCR	J.B. Tucker	10	5	1975				United States	California	Riverside County	P.L. Boyd Desert Research Center	3.5 miles S. Palm Desert, Coyote Creek	33.648	-116.376
Neopalpa neonata	UCIS 299777								UCR	J.B. Tucker	10	5	1975				United States	California	Riverside County	P.L. Boyd Desert Research Center	3.5 miles S. Palm Desert, Coyote Creek	33.648	-116.376
Neopalpa neonata	UCIS 300107								UCR	J.B. Tucker	17	5	1975				United States	California	Riverside County	P.L. Boyd Desert Research Center	3.5 miles S. Palm Desert, Coyote Creek	33.648	-116.376
Neopalpa neonata	UCIS 313273								UCR	J.B. Tucker	5	4	1975				United States	California	Riverside County	Deep Canyon, Coyote Creek		33.5833	-116.333
Neopalpa neonata	UCIS 313477								UCR	J.B. Tucker	12	4	1975				United States	California	Riverside County	P.L. Boyd Desert Research Center	3.5 miles S. Palm Desert, Alluvium Coyote Cn.	33.648	-116.376
Neopalpa neonata	UCIS 316734								UCR	Saul Frommer & R. Worley	4	11	1969	6	11	1969	United States	California	Riverside County	P.L. Boyd Desert Research Center	3.5 miles S. Palm Desert	33.648	-116.376		Malaise trap
Neopalpa neonata	UCIS 319300					VNZ	589	F	UCR	Saul Frommer & R. Worley	6	10	1969				United States	California	Riverside County	P.L. Boyd Desert Research Center	3.5 miles S. Palm Desert	33.648	-116.376		Malaise trap
Neopalpa neonata	UCIS 322207								UCR		20	2	1970	23	2	1970	United States	California	Riverside County	P.L. Boyd Desert Research Center	3.5 miles S. Palm Desert	33.648	-116.376		Malaise trap
Neopalpa neonata	UCIS 322208								UCR	Saul Frommer & R. Worley	20	2	1970				United States	California	Riverside County	P.L. Boyd Desert Research Center	3.5 miles S. Palm Desert	33.648	-116.376		Malaise trap
Neopalpa neonata	UCIS 322358					VNZ	566	M	UCR		19	7	1969	21	7	1969	United States	California	Riverside County	P.L. Boyd Desert Research Center	3.5 miles S. Palm Desert	33.648	-116.376		Malaise trap
Neopalpa neonata	UCRC ENT 461667								UCR	L. Gaston & H. Haid	30	9	1968				United States	California	Imperial County	Anza-Borrego State Park, Oyster Canyon		32.7875	-116.022		at light
Neopalpa neonata	UCRC ENT 461690					VNZ	587	F	UCR	M.E. Irwin, J.C. Ball	25	3	1964				Mexico	Baja California	3 mi. N. San Felipe			31.0736	-114.868		at light
Neopalpa neonata	UCRC ENT 461700								UCR	Saul Frommer, R. Worley and L. LaPre	31	1	1970	10	2	1970	United States	California	Riverside County	P.L. Boyd Desert Research Center	3.5 miles S. Palm Desert	33.648	-116.376		Malaise trap
Neopalpa neonata	UCRC ENT 461703								UCR	Saul Frommer, R. Worley and L. LaPre	31	1	1970	10	2	1970	United States	California	Riverside County	P.L. Boyd Desert Research Center	3.5 miles S. Palm Desert	33.648	-116.376		Malaise trap
Neopalpa neonata	UCRC ENT 461704								UCR	Saul Frommer, R. Worley and L. LaPre	31	1	1970	10	2	1970	United States	California	Riverside County	P.L. Boyd Desert Research Center	3.5 miles S. Palm Desert	33.648	-116.376		Malaise trap
Neopalpa neonata	UCRC ENT 461705								UCR	Saul Frommer, R. Worley and L. LaPre	31	1	1970	10	2	1970	United States	California	Riverside County	P.L. Boyd Desert Research Center	3.5 miles S. Palm Desert	33.648	-116.376		Malaise trap
Neopalpa neonata	UCRC ENT 461706					VNZ	590	M	UCR	Saul Frommer, R. Worley and L. LaPre	31	1	1970	10	2	1970	United States	California	Riverside County	P.L. Boyd Desert Research Center	3.5 miles S. Palm Desert	33.648	-116.376		Malaise trap
Neopalpa neonata	UCRC ENT 461707								UCR	Saul Frommer, R. Worley and L. LaPre	31	1	1970	10	2	1970	United States	California	Riverside County	P.L. Boyd Desert Research Center	3.5 miles S. Palm Desert	33.648	-116.376		Malaise trap
Neopalpa neonata	UCRC ENT 461708								UCR	Saul Frommer, R. Worley and L. LaPre	31	1	1970	10	2	1970	United States	California	Riverside County	P.L. Boyd Desert Research Center	3.5 miles S. Palm Desert	33.648	-116.376		Malaise trap
Neopalpa neonata	UCRC ENT 461709								UCR	Saul Frommer, R. Worley and L. LaPre	31	1	1970	10	2	1970	United States	California	Riverside County	P.L. Boyd Desert Research Center	3.5 miles S. Palm Desert	33.648	-116.376		Malaise trap
Neopalpa neonata	UCRC ENT 461711								UCR	Saul Frommer & R. Worley	20	2	1970	23	2	1970	United States	California	Riverside County	P.L. Boyd Desert Research Center	3.5 miles S. Palm Desert	33.648	-116.376		Malaise trap
Neopalpa neonata	UCRC ENT 461712								UCR	Saul Frommer & R. Worley	20	2	1970	23	2	1970	United States	California	Riverside County	P.L. Boyd Desert Research Center	3.5 miles S. Palm Desert	33.648	-116.376		Malaise trap
Neopalpa neonata	UCRC ENT 461713								UCR	Saul Frommer & R. Worley	20	2	1970	23	2	1970	United States	California	Riverside County	P.L. Boyd Desert Research Center	3.5 miles S. Palm Desert	33.648	-116.376		Malaise trap
Neopalpa neonata	UCRC ENT 461714								UCR	M.E. Irwin, S.Frommer	24	5	1969				United States	California	Riverside County	P.L. Boyd Desert Research Center	4 miles S. Palm Desert	33.6433	-116.376		Malaise trap
Neopalpa neonata	UCRC ENT 461716								UCR	Saul Frommer, R. Worley	5	4	1970	17	4	1970	United States	California	Riverside County	P.L. Boyd Desert Research Center	3.5 miles S. Palm Desert	33.648	-116.376		Malaise trap
Neopalpa neonata	UCRC ENT 461718								UCR	Frommer	16	8	1969	17	8	1969	United States	California	Riverside County	P.L. Boyd Desert Research Center	3.5 miles S. Palm Desert	33.648	-116.376		Malaise trap
Neopalpa neonata	UCREM 4317								UCR	M.E. Irwin	24	5	1964				United States	California	Riverside County	Deep Canyon		33.648	-116.376		at light
Neopalpa neonata	UCREM 4318								UCR	E.I. Schlinger & M.E. Irwin	18	11	1963				United States	California	Riverside County	Deep Canyon		33.648	-116.376		at light, in Tomato Foliage
Neoschema klotsi	DMNS ZE.49509	MNAK1034-14	658[0n]	KY442064	BOLD:ACR1258				DMNS	Paul Johnson	13	7	2014				United States	Nevada	White Pine County	Great Basin National Park	North Fork Lexington Creek	38.865	-114.177	2136	UV trap
Nevadopalpa maculata	CNCLEP00067412	MNAJ154-09	658[0n]	GU693660	BOLD:AAG5275				CNC	J.F. Landry	3	7	1985				Canada	Alberta	Sandy Point Campground			50.733	-110.05		MIC 6073 | At blacklight in short-grass prairie with greasewood, sage, prickly pear and rabbit-brush
Ochrodia subdiminutella	TLMF Lep 03285	PHLSA110-11	658[0n]	JN307709	BOLD:AAU1967				TLMF	Huemer P.	6	9	2005				Spain	Comunidad Valenciana	Valencia		Sierra de Crevillente, 5 km NE Albatera	38.2561	-0.911462	450
Phthorimaea operculella	CNCLEP00077354	MNAO179-11	658[0n]	KY442082	BOLD:AAB9396				CNC	B. & J.-F. Landry	13	7	1989				United States	Kansas	Trego County	Cedar Bluff State Park		38.774	-99.774
Pogochaetia solitaria	TLMF Lep 11921	LEATE509-13	658[0n]	KY442226	BOLD:ACA9790				TLMF	P. Huemer	18	8	2013				Italy	South Tyrol			Schleiser Leiten	46.698	10.517
Pogochaetia solitaria	TLMF Lep 13705	LEATF393-14	658[0n]	KY442200	BOLD:ACA9790				TLMF	P. Huemer	7	9	2013				Italy	South Tyrol	Vinschgau		Schleiser Leiten	46.698	10.517	1320
Sattleria dzieduszyckii	TLMF Lep 08928	PHLAI433-13	657[1n]	KY442098	BOLD:AAV8914				TLMF	Panigaj L.	15	7	2003				Slovakia				Zbojnicka chata	49.174	20.178	1850
Scrobipalpa heliopa	RMNH.INS.540538	LEUAE573-12	658[0n]	KY442210	BOLD:AAW5797				RMHN	C. Gielis	17	4	2006				United Arab Emirates	Ras al-Khaymah			10 km NNE Huwaylat	24.967	56.217	450
Scrobipalpopsis petasitis	TLMF Lep 01930	PHLAB1130-10	658[0n]	HQ968342	BOLD:AAE1641				TLMF	Huemer P.	8	6	2010				Austria	Tirol	Nordtirol		Halltal	47.327	11.525	1000
Scrobipalpula psilella	TLMF Lep 16812	ABOLA852-15	658[0n]	KY442204	BOLD:AAF1106				TLMF	P. Huemer	5	7	2014				Austria	Tirol	Nordtirol	Fliess/ Voegele Bichl		47.116	10.626
Sitotroga cerealella	CNCLEP00076665	MNAC960-11	658[0n]	KY442261	BOLD:AAD0546				CNC	G Clarke Topp	22	8	1994				Canada	Ontario		Ottawa	[probably 45 Foothills Drive, Nepean K2H 6K6]	45.32	-75.81	85	in house
Symmetrischema plaesiosoma	CCDB-15380-F04	PHLCD081-12	658[0n]	KY442097	BOLD:AAI0238				CNC	Paul Hebert	16	10	2011				Australia	Australian Capital Territory	Canberra	Cook	8 Moss Street	-35.261	149.059	632	MV light
Tecia solanivora	USNM ENT 00980761	FRUT729-14	658[0n]	KY442260	BOLD:ACP2393				USNM	K. Nishida	29	10	2009				Costa Rica	San Jose		Curridabat	Plaza del Sol Automercado supermarket	9.90562	-84.0174	1200	reared from a potato in a potato bag
Teleiodes vulgella	TLMF Lep 08053	PHLAV234-12	658[0n]	KM572638	BOLD:AAE9855				TLMF	Huemer P.	15	6	2012				Austria	Vorarlberg			Bludesch, Bludescher Magerrasen E, Umg. Jordan	47.203	9.747	610
Tila capsophilella	TLMF Lep 13508	LEATF196-14	658[0n]	KY442086	BOLD:ACL7124				TLMF	P. Huemer	5	8	2013				Austria		Nordtirol		Steinseehuettenweg	47.176	10.604	880
Tuta absoluta	TLMF Lep 01462	PHLAB662-10	658[0n]	HQ968678	BOLD:AAJ8033				TLMF	Nel J.	10	7	2009				France	Provence-Alpes-Cote d'Azur			La Ciotat	43.181	5.597	100	e.l.
Vladimirea ivinskisi	MZH-LEP00000089	MNAP530-12	658[0n]	KY442080	BOLD:ACA7902				MZH	L. Kaila & K. Mikkola	29	7	1990				Kyrgyzstan			30 km E Naryn		41.42	76.33	2500	Hk.5358 | ad luc: agric. land/steppe
